# Supplementary material for: Aerobic hydrocarbon oxidation in a novel archaeal lineage
Source: Research Square preprint supplement (doi:10.21203/rs.3.rs-5714735/v1), 2025-01-22
Supplement: Supplementary file 1 [file 8cb1529b5fb2f38a8e5bafda.xlsx]

## Sheet: Suppl. Table 1
Name	Completeness	Contamination	Completeness_Model_Used	Translation_Table_Used	Coding_Density	Contig_N50	Average_Gene_Length	Genome_Size	GC_Content	Total_Coding_Sequences	Total_Contigs	Max_Contig_Length	Presence of 5S, 16S 23S rRNA gene	tRNA number	SRA_accession	Environment	Adjusted_genome_size
CM-1	86.64	1.45	Gradient Boost (General Model)	11	0.906	37736	278.187	2018693	0.69	2196	98	96661	16S, 23S, 5S	45	SRR5161788,SRR5161794,SRR5161795,SRR5161805	Brazillian copper mine	2.29668e+06
CG-1	89.8	0.41	Gradient Boost (General Model)	11	0.906	63958	292.238	2248072	0.68	2328	77	224034	16S, 23S, 5S	44	SRR12113409,SRR12113410,SRR12113411,SRR12113416,SRR12113418,SRR12113419,SRR12113420,SRR12113422,SRR12113424,SRR12113425,SRR12113426,SRR12113428,SRR12113429,SRR12113430,SRR12113431,SRR12113432,SRR12113433	California groundwater	2.4932e+06
CG-2	82.48	0.48	Gradient Boost (General Model)	11	0.92	55957	280.612	2022190	0.68	2215	56	201441	5S, 23S (partial)	43	SRR12113409,SRR12113410,SRR12113411,SRR12113416,SRR12113418,SRR12113419,SRR12113420,SRR12113422,SRR12113424,SRR12113425,SRR12113426,SRR12113428,SRR12113429,SRR12113430,SRR12113431,SRR12113432,SRR12113433	California groundwater	2.44002e+06
MW-1	28.19	0.07	Neural Network (Specific Model)	11	0.91	2354	214.774	724377	0.68	1027	299	7532	16S (partial), 5S	8	ERR6226080	Aquifer (Majorca)	2.56783e+06
YL-1	93.66	0.7	Gradient Boost (General Model)	11	0.908	95798	302.212	2396298	0.48	2407	44	227048	16S (partial), 23S, 5S	43	SRR11719878	Yellowstone Lake sediments	2.54072e+06
YL-2	78.65	0.88	Gradient Boost (General Model)	11	0.926	7454	266.385	1779509	0.48	2067	319	26667	16S	29	SRR9617649	Yellowstone Lake sediments	2.24283e+06

## Sheet: Suppl. Table 2
Binding sites	Compound	PDBID	g-RMSd	Asym	l-RMSd	TCS
CuB site (CM-1)	Cu	6CXH.A	1.93	X	0.86	0.38
CuC site (CM-1)	Cu	4PI0.G	4.33	E	0.35	0.33
CuB site (CG-1)	Cu	6CXH.A	2.9	T	0.76	0.1
CuC site (CG-1)	Cu	4PI0.G	4.52	E	0.35	0.37

## Sheet: Suppl. Table 3
Category	Gene_ID	ANME-1-THS_sp014859735	ANME1a_sp003194425	Alkanophaga_liquidiphilum	Alkanophaga_volatiphilum	DAOWMC01_sp030643285	G60ANME1_sp021159465	JACGMN01_sp011049045	JAFNKG01_sp017883965	JAGXOR01_sp023659785	JAGXOS01_sp023131215	JAUWIL01_sp030605385	Methanospirare_jalkutatii	Methanoxibalbensis_ujae	QENH01_sp003336485	QENJ01_sp013374505	QEXZ01_sp013180605	QMVO01_sp003661125	Syntropharchaeum_butanivorans	Syntropharchaeum_caldarius	Syntropharchaeum_sp026134025	CG-1	CG-2	MW-1	YL-2	YL-1	WJOV01_sp016782355	CM-1	spire_mag_02087375	spire_mag_02087448
Aerobic_respiration	coxA	0	0	0	0	0	0	0	0	0	0	0	0	0	0	0	0	0	0	0	0	1	1	1	0	0	0	1	0	0
Aerobic_respiration	coxB	0	0	0	0	0	0	0	0	0	0	0	0	0	0	0	0	0	0	0	0	1	1	0	0	0	0	1	0	0
Aerobic_respiration	ctaA	0	0	0	0	0	0	0	0	0	0	0	0	0	0	0	0	0	0	0	0	0	1	0	0	0	0	0	0	0
Aerobic_respiration	ctaB	0	0	0	0	0	0	0	0	0	0	0	0	0	0	0	0	0	0	0	0	1	1	0	0	0	0	1	0	0
Aerobic_respiration	hmoA	0	0	0	0	0	0	0	0	0	0	0	0	0	0	0	0	0	0	0	0	1	0	1	0	0	0	1	0	0
Aerobic_respiration	hmoB	0	0	0	0	0	0	0	0	0	0	0	0	0	0	0	0	0	0	0	0	1	0	0	0	0	0	1	0	0
Aerobic_respiration	hmoC	0	0	0	0	0	0	0	0	0	0	0	0	0	0	0	0	0	0	0	0	1	0	1	0	0	0	1	0	0
Alkane_activation	ALDH	1	0	0	0	1	0	0	0	0	0	0	0	0	0	1	0	1	0	0	0	1	1	1	0	0	0	1	1	0
Alkane_activation	acrA	1	1	1	1	1	1	1	1	1	1	1	1	1	1	1	1	1	1	1	1	0	0	0	0	0	1	0	1	1
Alkane_activation	acrB	1	1	1	1	1	1	1	1	1	1	1	1	1	1	1	1	1	1	1	1	0	0	0	0	0	1	0	1	1
Alkane_activation	acrG	1	1	1	1	1	1	1	1	1	1	1	1	1	1	0	1	1	1	1	1	0	0	0	0	0	1	0	1	1
Alkane_activation	adh	0	0	0	0	0	0	0	0	0	0	0	0	0	0	0	0	0	0	0	0	0	0	0	1	1	0	0	0	0
Alkane_activation	adhC	0	0	0	0	0	0	0	0	0	0	0	0	0	0	0	0	0	0	0	0	1	1	0	0	0	0	1	0	0
Alkane_activation	adhE	0	0	0	0	0	0	0	0	0	0	0	0	0	0	0	0	0	0	0	0	1	1	1	1	1	0	1	0	0
Alkane_activation	aor	1	1	1	1	1	1	1	1	1	1	1	1	1	1	1	1	1	1	1	1	1	1	0	1	1	1	1	1	1
Fatty_acid_degradation	ACADM,bcd,acd	1	1	1	1	1	1	0	1	1	1	1	1	1	1	1	1	1	1	1	1	1	1	1	1	1	1	1	1	1
Fatty_acid_degradation	ACAT,atoB	0	0	0	0	0	0	0	0	0	0	0	0	0	0	0	0	0	0	1	1	0	0	0	0	0	0	1	0	0
Fatty_acid_degradation	ACSL,fadD	0	0	1	0	0	0	0	0	0	0	1	0	0	0	0	0	0	0	0	0	1	1	1	0	1	0	1	1	0
Fatty_acid_degradation	ACSM	0	0	0	0	0	0	1	0	0	1	0	0	0	1	0	1	0	0	0	0	0	0	0	0	0	0	0	0	0
Fatty_acid_degradation	crt	1	1	1	1	1	1	1	1	1	1	1	1	1	1	1	1	1	1	1	1	1	1	1	1	1	1	1	1	1
Fatty_acid_degradation	fadA	0	0	0	1	1	0	0	0	0	0	0	0	0	0	0	0	0	0	0	0	1	1	0	1	1	0	0	1	1
Fatty_acid_degradation	fadB	1	1	1	1	0	1	1	1	1	1	1	1	1	1	1	1	1	1	1	1	1	1	0	1	1	0	1	1	0
Fatty_acid_degradation	hadh	0	0	1	1	0	0	0	0	0	0	0	0	0	0	0	0	0	0	0	0	0	0	0	0	0	0	0	0	1
Methanogenesis	cdhA	1	1	1	1	0	1	1	1	1	1	1	1	1	1	1	1	1	1	1	1	0	0	0	1	1	0	0	1	1
Methanogenesis	cdhB	1	1	1	1	0	1	1	1	1	1	1	1	1	1	0	1	1	1	1	1	0	0	0	1	1	0	0	1	1
Methanogenesis	cdhC	1	1	1	1	1	1	1	1	1	1	1	1	1	1	1	1	1	1	1	1	0	0	0	1	1	1	0	1	1
Methanogenesis	cdhD,acsD	1	1	1	1	1	1	1	0	1	1	1	1	1	1	1	1	1	1	1	1	0	0	0	1	1	1	0	1	1
Methanogenesis	cdhE,acsC	1	1	1	1	1	1	1	1	1	0	1	1	1	1	1	1	0	1	1	1	0	0	0	1	1	1	0	1	1
Methanogenesis	ftr	1	1	1	1	1	1	1	1	1	1	1	1	1	1	1	1	1	1	1	1	0	0	0	1	1	1	0	1	1
Methanogenesis	fwdA,fmdA	1	1	1	1	1	1	1	1	1	1	1	1	1	1	1	1	1	1	1	1	0	0	0	1	1	1	0	1	1
Methanogenesis	fwdB,fmdB	1	1	1	1	1	1	1	1	1	1	1	1	1	1	1	1	1	1	1	1	0	0	0	0	1	1	0	1	1
Methanogenesis	fwdC,fmdC	1	1	1	1	1	1	1	1	1	1	1	1	1	1	1	1	1	1	1	1	0	0	0	1	1	1	0	1	1
Methanogenesis	fwdD,fmdD	1	1	1	1	1	1	1	1	1	1	1	1	1	1	0	1	1	1	1	1	0	0	0	1	1	1	0	1	1
Methanogenesis	fwdE,fmdE	0	0	1	1	0	0	1	0	0	1	0	0	0	1	1	1	0	1	1	0	0	0	0	0	0	0	0	0	1
Methanogenesis	fwdF,fmdF	0	0	1	0	0	0	0	0	0	0	1	1	1	0	0	0	0	1	1	1	0	0	0	0	1	0	0	1	1
Methanogenesis	fwdG	0	0	1	1	1	1	0	1	0	0	1	1	1	1	1	0	1	1	1	0	0	0	0	1	1	1	0	1	0
Methanogenesis	mch	1	1	1	1	1	1	1	1	1	1	1	1	1	1	1	1	1	1	1	1	1	1	0	1	1	1	1	1	1
Methanogenesis	mer	0	0	1	1	1	0	0	0	0	0	0	0	0	0	0	0	0	0	0	0	1	1	0	1	1	0	1	1	1
Methanogenesis	metF	1	1	1	1	1	1	1	1	1	0	1	1	1	1	1	0	1	1	1	1	0	0	0	1	1	1	0	1	1
Methanogenesis	mtd	0	0	0	0	1	0	0	0	0	0	1	0	0	0	0	0	0	0	0	0	0	0	0	0	1	0	0	1	1
Methanogenesis	mtrA	1	1	1	1	0	1	1	1	1	1	0	1	1	1	1	1	1	1	1	0	0	0	0	0	0	0	0	0	0
Methanogenesis	mtrB	1	1	0	0	0	1	1	1	1	1	0	1	1	1	1	1	1	0	0	0	0	0	0	0	0	0	0	0	0
Methanogenesis	mtrC	1	1	0	0	0	1	1	1	1	0	0	1	1	1	1	1	1	0	0	0	0	0	0	0	0	0	0	0	0
Methanogenesis	mtrD	1	1	0	0	0	1	1	1	1	0	0	1	1	1	1	1	1	0	0	0	0	0	0	0	0	0	0	0	0
Methanogenesis	mtrE	1	1	0	0	0	1	1	1	1	0	0	1	1	1	1	1	1	0	0	0	0	0	0	0	0	0	0	0	0
Methanogenesis	mtrH	1	1	0	0	0	1	1	1	1	1	0	1	1	1	1	1	1	0	0	0	0	0	0	1	1	0	0	0	0
Proprionate_assimilation	MCEE	0	0	0	0	0	0	0	0	0	0	0	0	0	0	0	0	0	0	0	0	1	1	0	1	1	0	1	1	0
Proprionate_assimilation	mcmA1	0	0	1	1	1	0	0	0	0	0	0	0	0	0	0	0	0	1	1	1	1	1	0	1	1	0	1	1	0
Proprionate_assimilation	mcmA2	0	0	1	1	1	0	0	0	0	0	0	0	0	0	0	0	0	1	1	1	1	1	0	1	1	0	1	1	0
Proprionate_assimilation	pcc	0	0	0	0	0	0	0	1	0	0	0	0	0	1	0	0	0	0	0	0	1	0	0	1	0	0	1	0	0
Atpase	atpA	1	1	1	1	1	1	1	1	1	1	1	1	1	1	1	1	1	1	1	1	0	1	1	1	0	1	1	1	1
Atpase	atpB	1	1	1	1	1	1	1	1	1	1	1	1	1	1	1	1	1	1	1	1	0	1	1	0	1	1	1	1	1
Atpase	atpC	1	1	1	1	1	1	1	1	0	0	1	1	1	1	1	1	1	1	1	1	0	1	1	0	1	1	1	1	1
Atpase	atpD	1	1	1	1	1	1	0	1	1	1	1	1	1	1	1	1	1	1	1	1	1	1	1	0	1	1	1	1	1
Atpase	atpE	1	1	1	1	1	1	1	1	1	1	1	1	1	1	1	1	1	1	1	1	0	1	1	0	1	1	1	1	1
Atpase	atpF	1	1	1	1	1	1	1	1	1	1	1	1	1	1	1	1	1	1	1	1	0	1	1	0	1	1	1	1	1
Atpase	atpG	1	1	0	0	1	0	0	0	1	0	0	1	1	1	1	0	1	1	1	0	0	1	1	1	1	1	1	0	1
Atpase	atpI	1	1	1	1	1	1	1	1	0	1	1	1	0	1	1	1	1	1	1	1	0	1	1	0	1	1	1	1	1
Atpase	atpK	1	1	1	1	1	0	1	1	0	0	1	1	1	1	1	1	1	1	1	1	0	1	1	0	1	1	1	1	1
Complex_I	fpoO	0	0	0	0	0	0	0	0	0	0	0	0	0	0	0	0	0	0	0	0	0	0	0	0	0	1	0	0	0
Complex_I	ndhG	0	0	0	0	0	0	0	0	0	0	0	0	0	0	0	0	0	0	0	0	0	0	0	1	1	1	0	0	0
Complex_I	nuoA	1	1	0	0	0	0	0	0	0	0	0	0	0	0	0	1	0	0	0	0	0	1	1	1	0	1	1	0	0
Complex_I	nuoB	1	1	0	0	0	0	0	0	0	0	0	0	0	0	0	1	0	0	0	0	0	1	1	1	1	1	1	0	0
Complex_I	nuoC	1	1	0	0	0	0	0	0	0	0	0	0	0	0	0	1	0	1	0	0	0	1	1	0	1	1	0	0	0
Complex_I	nuoD	1	1	0	0	0	0	0	0	0	0	0	0	0	0	0	1	0	0	0	0	0	1	1	0	1	1	1	0	0
Complex_I	nuoE	0	0	1	1	1	1	1	1	0	0	1	1	1	1	0	0	0	0	0	0	0	0	0	0	0	0	0	1	1
Complex_I	nuoF	0	0	1	1	0	1	1	1	0	0	1	1	1	1	0	0	0	0	0	0	1	0	0	0	0	0	0	1	1
Complex_I	nuoG	0	0	0	0	0	0	0	0	0	0	0	0	0	1	1	1	1	1	1	0	1	0	0	0	1	1	0	1	1
Complex_I	nuoH	1	1	0	0	0	0	0	0	0	0	0	0	0	0	0	1	0	0	0	0	0	1	1	1	1	1	1	0	0
Complex_I	nuoI	1	1	0	0	0	0	0	0	0	0	0	0	0	0	0	1	0	0	0	0	0	1	1	0	0	1	1	0	0
Complex_I	nuoJ	1	1	0	0	0	0	0	0	0	0	0	0	0	0	0	1	0	0	0	0	0	1	1	0	0	0	1	0	0
Complex_I	nuoK	1	1	0	0	0	0	0	0	0	0	0	0	0	0	0	1	0	0	0	0	0	1	1	0	1	1	1	0	0
Complex_I	nuoL	1	1	0	0	0	1	0	0	1	0	1	0	1	0	0	1	0	0	0	0	0	1	1	0	1	1	1	0	0
Complex_I	nuoM	0	0	0	1	0	1	1	0	1	0	1	0	1	0	0	0	0	0	0	0	0	1	1	1	1	1	1	0	0
Complex_I	nuoN	1	1	0	0	0	0	0	0	0	0	0	0	0	0	0	1	0	0	0	0	0	1	1	1	1	1	0	0	0
Complex_II	sdhA	0	0	0	0	1	0	0	0	0	0	0	0	0	0	0	0	0	0	0	0	0	1	1	0	0	0	1	0	0
Complex_II	sdhB	0	0	0	0	0	0	0	0	0	0	0	0	0	0	0	0	0	0	0	0	0	1	1	0	0	0	1	0	0
Complex_II	sdhC	0	0	0	0	0	0	0	0	0	0	0	0	0	0	0	0	0	0	0	0	0	0	1	0	0	0	0	0	0
Complex_II	sdhD	0	0	0	0	0	0	0	0	0	0	0	0	0	0	0	0	0	0	0	0	0	1	0	0	0	0	1	0	0
Glycolysis	apgM	1	1	1	1	1	1	1	1	1	1	1	1	1	1	1	1	1	1	1	1	1	1	1	1	1	1	1	1	1
Glycolysis	aroF	1	1	1	1	1	1	1	1	1	1	1	1	1	1	1	1	1	1	1	1	1	1	1	0	1	1	1	1	1
Glycolysis	eno	1	1	1	1	1	1	0	0	1	1	1	1	1	1	1	1	1	1	1	1	1	1	1	0	1	1	1	1	1
Glycolysis	fbp	1	1	1	0	1	1	1	0	1	0	1	1	1	1	1	1	1	1	0	0	1	1	1	1	1	1	1	1	0
Glycolysis	gap	1	1	1	1	1	1	1	1	1	1	1	1	1	1	1	1	1	1	1	1	0	1	1	0	0	1	1	1	1
Glycolysis	glcK	0	0	0	1	0	0	0	0	0	0	0	0	0	1	1	0	1	0	0	0	0	1	1	0	0	0	1	0	0
Glycolysis	gpmB	0	0	0	0	0	0	0	0	0	0	0	0	0	0	0	0	0	0	0	0	0	1	0	1	0	0	1	0	0
Glycolysis	manB	0	0	0	0	0	0	1	0	0	0	0	0	0	0	0	0	0	0	0	0	0	0	0	0	0	0	0	1	0
Glycolysis	pgi1	1	1	1	1	1	1	1	1	1	1	1	0	1	0	1	1	1	1	1	1	0	1	1	0	1	1	1	1	1
Glycolysis	pgk	1	0	1	1	1	1	1	1	1	1	1	1	1	1	1	1	1	1	1	1	1	1	1	1	1	1	1	1	0
Glycolysis	pmm-pgm	1	1	1	1	0	1	1	1	0	1	1	1	1	1	1	1	1	1	1	1	1	1	1	1	1	1	1	1	1
Glycolysis	tpiA	1	1	1	1	1	1	1	1	1	0	1	1	1	1	1	1	1	1	1	1	0	1	1	1	1	1	1	1	1
TCA_cycle	IDH3	0	0	1	0	0	0	0	0	0	0	1	1	0	1	0	0	0	0	0	0	0	1	1	0	1	1	1	0	0
TCA_cycle	acnA	1	1	1	1	1	1	1	0	1	0	1	1	1	1	0	1	0	0	0	0	1	1	1	1	0	0	1	0	1
TCA_cycle	cs	0	0	0	0	0	0	0	0	0	0	0	0	0	0	0	0	0	0	0	0	0	1	1	1	0	0	1	0	0
TCA_cycle	fumC	0	0	0	0	0	0	0	0	0	0	0	0	0	0	0	0	0	0	0	0	0	1	1	0	0	0	1	0	0
TCA_cycle	icd	1	1	0	1	1	1	1	1	1	0	0	0	0	0	0	1	0	0	0	0	0	0	0	0	0	0	0	0	0
TCA_cycle	korA	0	0	0	0	0	1	0	0	0	0	0	0	0	0	0	0	0	0	0	0	1	1	1	0	1	1	1	1	1
TCA_cycle	korB	0	0	0	0	0	1	0	0	0	0	0	0	0	0	0	0	0	0	0	0	1	1	1	0	1	1	1	1	1
TCA_cycle	korC	0	0	0	0	0	0	0	0	0	0	0	0	0	0	0	0	0	0	0	0	1	1	1	0	1	1	1	1	1
TCA_cycle	korD	0	0	0	0	0	0	0	0	0	0	0	0	0	0	0	0	0	0	0	0	1	1	1	0	1	1	1	1	0
TCA_cycle	mdh	0	0	0	0	0	0	0	0	0	0	0	0	0	0	0	0	0	0	0	0	1	1	0	0	1	1	1	0	1
TCA_cycle	sucC	0	0	0	0	0	0	0	0	0	0	0	0	0	0	0	0	0	0	0	0	1	1	1	0	1	1	1	1	0
TCA_cycle	sucD	0	0	0	0	0	0	0	0	0	0	0	0	0	0	0	0	0	0	0	0	1	1	1	0	1	1	1	1	0
bc_complex	FeS	0	0	0	0	0	0	0	0	0	0	0	0	0	0	0	0	0	0	0	0	0	0	0	0	0	0	1	0	0
bc_complex	QcrA	0	0	0	0	0	0	0	0	0	0	0	0	0	0	0	0	0	0	0	0	0	1	1	1	0	0	0	0	0
bc_complex	QcrB	0	0	0	0	0	0	0	0	0	0	0	0	0	0	0	0	0	0	0	0	0	1	1	0	0	0	1	0	0
bc_complex	cytC	0	0	0	0	0	0	0	0	0	0	0	0	0	0	0	0	0	0	0	0	0	1	1	1	0	0	1	0	0
bc_complex	cytb6	0	0	0	0	0	0	0	0	0	0	0	0	0	0	0	0	0	0	0	0	0	1	1	1	0	0	1	0	0
etf_complex	etfA	1	1	0	0	0	0	0	0	0	0	0	0	0	0	0	0	0	1	1	1	1	1	1	0	0	1	1	1	0
etf_complex	etfB	1	1	0	0	0	0	0	0	0	0	0	0	0	0	0	1	0	1	1	1	1	1	1	0	0	1	1	1	0
etf_complex	etfC	1	1	0	0	0	0	0	0	0	0	0	0	0	0	0	1	0	1	1	1	1	1	1	0	0	1	1	1	0
fix_complex	fixA	0	0	0	0	0	0	0	0	0	0	0	0	0	0	0	0	0	0	0	0	0	1	0	0	0	0	1	0	0
fix_complex	fixB	0	0	0	0	0	0	0	0	0	0	0	0	0	0	0	0	0	0	0	0	0	1	0	0	0	0	1	0	0
fix_complex	fixC	0	0	0	0	0	0	0	0	0	0	0	0	0	0	0	0	0	0	0	0	0	1	0	0	0	0	1	0	0
fix_complex	fixX	0	0	0	0	0	0	0	0	0	0	0	0	0	0	0	0	0	0	0	0	0	1	0	0	0	0	1	0	0
fpo_complex	fpoA	1	1	1	1	1	1	0	1	1	0	1	1	1	1	1	1	1	1	1	0	0	0	0	0	0	0	0	0	0
fpo_complex	fpoB/C	0	0	0	0	1	1	0	1	1	0	1	0	1	0	1	0	1	0	0	0	0	0	0	0	0	0	0	0	0
fpo_complex	fpoD	1	1	1	1	0	0	0	0	0	1	0	1	0	1	0	1	0	1	1	0	0	0	0	0	0	0	0	0	0
fpo_complex	fpoH	1	1	1	1	1	1	0	1	1	1	1	1	1	1	1	1	1	1	1	0	0	0	0	0	0	0	0	0	0
fpo_complex	fpoI	1	1	1	1	1	1	0	1	1	1	1	1	1	1	1	1	1	1	1	0	0	0	0	0	0	0	0	0	0
fpo_complex	fpoJ	1	1	1	1	1	1	0	1	1	0	1	1	1	1	1	1	1	1	1	0	0	0	0	0	0	0	0	0	0
fpo_complex	fpoK	1	1	1	1	1	1	0	1	1	0	1	1	1	1	1	1	1	1	1	0	0	0	0	0	0	0	0	0	0
fpo_complex	fpoL	0	0	1	1	1	1	0	1	1	0	1	1	1	1	1	0	1	1	1	0	0	0	0	0	0	0	0	0	0
fpo_complex	fpoM	1	1	0	0	0	0	0	0	0	0	0	0	0	0	0	1	0	0	0	0	0	0	0	0	1	0	0	0	0
fpo_complex	fpoM2	0	0	1	1	1	1	0	1	1	0	1	1	1	1	1	0	1	1	1	0	0	0	0	0	0	0	0	0	0
fpo_complex	fpoN	0	0	0	0	0	0	0	0	0	0	0	0	0	0	0	1	0	0	0	0	0	0	0	0	0	0	1	0	0
fpo_complex	fpoN2	1	1	1	1	1	1	0	1	1	0	1	1	1	1	1	1	1	1	1	0	0	0	0	0	0	0	0	0	0
fpo_complex	fpoO	0	0	0	0	0	0	0	0	0	0	0	0	0	0	0	0	0	0	0	0	0	0	0	0	0	1	0	0	0

## Sheet: Suppl. Table 4
Category	Gene_name	KO_ID	Gene_description	CG-1	YL-1
Aerobic_respiration	coxA	K02274	cytochrome c oxidase subunit I [EC:7.1.1.9]	CG-1_02288
Aerobic_respiration	coxB	K02275	cytochrome c oxidase subunit II [EC:7.1.1.9]	CG-1_02289
Aerobic_respiration	coxD	K02277	cytochrome c oxidase subunit IV [EC:7.1.1.9]	CG-1_02291
Aerobic_respiration	coxC	K02276	cytochrome c oxidase subunit III [EC:7.1.1.9]	CG-1_02292
Aerobic_respiration	ctaB	K02257	heme o synthase [EC:2.5.1.141]	CG-1_02286
Aerobic_respiration	hmoA	K10944	methane/ammonia monooxygenase subunit A [EC:1.14.18.3 1.14.99.39]	CG-1_02061
Aerobic_respiration	hmoB	K10945	methane/ammonia monooxygenase subunit B	CG-1_02062
Aerobic_respiration	hmoC	K10946	methane/ammonia monooxygenase subunit C	CG-1_02060
Alkane_activation	adh	K00001	alcohol dehydrogenase [EC:1.1.1.1]		YL-1_01056
Alkane_activation	adhC	K00121	S-(hydroxymethyl)glutathione dehydrogenase / alcohol dehydrogenase [EC:1.1.1.284 1.1.1.1]	CG-1_01281
Alkane_activation	adhE	K04072	acetaldehyde dehydrogenase / alcohol dehydrogenase [EC:1.2.1.10 1.1.1.1]	CG-1_01122,CG-1_02209	YL-1_00558
Alkane_activation	aor	K03738	aldehyde:ferredoxin oxidoreductase [EC:1.2.7.5]	CG-1_01955	YL-1_00232,YL-1_01345,YL-1_01381,YL-1_01644,YL-1_01929
Atpase	atpA	K02117	V/A-type H+/Na+-transporting ATPase subunit A [EC:7.1.2.2 7.2.2.1]	CG-1_00637	YL-1_00938
Atpase	atpB	K02118	V/A-type H+/Na+-transporting ATPase subunit B	CG-1_00638	YL-1_00939
Atpase	atpC	K02119	V/A-type H+/Na+-transporting ATPase subunit C	CG-1_00031	YL-1_00936
Atpase	atpD	K02120	V/A-type H+/Na+-transporting ATPase subunit D	CG-1_00017	YL-1_00940
Atpase	atpE	K02121	V/A-type H+/Na+-transporting ATPase subunit E	CG-1_00032	YL-1_00935
Atpase	atpF	K02122	V/A-type H+/Na+-transporting ATPase subunit F	CG-1_00353	YL-1_00937
Atpase	atpG	K02107	V/A-type H+/Na+-transporting ATPase subunit G/H	CG-1_00036	YL-1_00932
Atpase	atpI	K02123	V/A-type H+/Na+-transporting ATPase subunit I	CG-1_00034,CG-1_00035	YL-1_00933
Atpase	atpK	K02124	V/A-type H+/Na+-transporting ATPase subunit K	CG-1_00033	YL-1_00934
Complex_I	nuoA	K00330	NADH-quinone oxidoreductase subunit A [EC:7.1.1.2]	CG-1_02101	YL-1_01352
Complex_I	nuoB	K00331	NADH-quinone oxidoreductase subunit B [EC:7.1.1.2]	CG-1_02102	YL-1_01353
Complex_I	nuoC	K00332	NADH-quinone oxidoreductase subunit C [EC:7.1.1.2]	CG-1_02103	YL-1_01354
Complex_I	nuoD	K00333	NADH-quinone oxidoreductase subunit D [EC:7.1.1.2]	CG-1_02104	YL-1_01355
Complex_I	nuoG	K00336	NADH-quinone oxidoreductase subunit G [EC:7.1.1.2]	CG-1_02105	YL-1_02105
Complex_I	nuoH	K00337	NADH-quinone oxidoreductase subunit H [EC:7.1.1.2]	CG-1_02106	YL-1_01356
Complex_I	nuoI	K00338	NADH-quinone oxidoreductase subunit I [EC:7.1.1.2]	CG-1_02107	YL-1_01357
Complex_I	nuoJ	K00339	NADH-quinone oxidoreductase subunit J [EC:7.1.1.2]	CG-1_00840	YL-1_01358
Complex_I	nuoK	K00340	NADH-quinone oxidoreductase subunit K [EC:7.1.1.2]	CG-1_00842	YL-1_01360
Complex_I	nuoL	K00341	NADH-quinone oxidoreductase subunit L [EC:7.1.1.2]	CG-1_00843	YL-1_01361,YL-1_02232
Complex_I	nuoM	K00342	NADH-quinone oxidoreductase subunit M [EC:7.1.1.2]	CG-1_00844	YL-1_01362,YL-1_01363
Complex_I	nuoN	K00343	NADH-quinone oxidoreductase subunit N [EC:7.1.1.2]	CG-1_00845	YL-1_01364
Complex_II	sdhA	K00239	succinate dehydrogenase flavoprotein subunit [EC:1.3.5.1]	CG-1_02221
Complex_II	sdhB	K00240	succinate dehydrogenase iron-sulfur subunit [EC:1.3.5.1]	CG-1_02222
Complex_II	sdhD	K00242	succinate dehydrogenase membrane anchor subunit	CG-1_02220
Fatty_acid_degradation	ACADM,bcd,acd	K00249	acyl-CoA dehydrogenase [EC:1.3.8.7]	CG-1_00368,CG-1_00764,CG-1_02362,CG-1_02367	YL-1_00259,YL-1_00423
Fatty_acid_degradation	ACADM,bcd,acd	K18244	acyl-CoA dehydrogenase [EC:1.3.99.-]	CG-1_00361,CG-1_00367,CG-1_00434,CG-1_00435,CG-1_00699,CG-1_00951,CG-1_00997,CG-1_01330,CG-1_01789,CG-1_01882,CG-1_02357	YL-1_00001,YL-1_00012,YL-1_00748,YL-1_01430,YL-1_01452,YL-1_01788,YL-1_02085,YL-1_02220
Fatty_acid_degradation	ACSL,fadD	K01897	long-chain acyl-CoA synthetase [EC:6.2.1.3]	CG-1_02111	YL-1_00292
Fatty_acid_degradation	crt	K01715	enoyl-CoA hydratase [EC:4.2.1.17]	CG-1_00855,CG-1_01677,CG-1_01697,CG-1_01880,CG-1_01982	YL-1_00488,YL-1_01159,YL-1_01904
Fatty_acid_degradation	crt	K01692	enoyl-CoA hydratase [EC:4.2.1.17]~enoyl-CoA hydratase [EC:4.2.1.17]		YL-1_00488,YL-1_01904
Fatty_acid_degradation	fadA	K00632	acetyl-CoA acyltransferase [EC:2.3.1.16]	CG-1_00211	YL-1_00514,YL-1_00612,YL-1_00630
Fatty_acid_degradation	fadB	K00074	3-hydroxybutyryl-CoA dehydrogenase [EC:1.1.1.157]	CG-1_00789,CG-1_00856	YL-1_00487,YL-1_01903
Gluconeogenesis/glycolysis	apgM	K15635	2,3-bisphosphoglycerate-independent phosphoglycerate mutase [EC:5.4.2.12]	CG-1_01115,CG-1_01280	YL-1_00560,YL-1_01886
Gluconeogenesis/glycolysis	aroF	K16306	fructose-bisphosphate aldolase / 2-amino-3,7-dideoxy-D-threo-hept-6-ulosonate synthase [EC:4.1.2.13 2.2.1.10]	CG-1_02302	YL-1_00765
Gluconeogenesis/glycolysis	eno	K01689	enolase 1/2/3 [EC:4.2.1.11]	CG-1_01662	YL-1_01163
Gluconeogenesis/glycolysis	fbp	K01622	fructose 1,6-bisphosphate aldolase/phosphatase [EC:4.1.2.13 3.1.3.11]	CG-1_00401	YL-1_01800
Gluconeogenesis/glycolysis	gap	K00134	glyceraldehyde 3-phosphate dehydrogenase (phosphorylating) [EC:1.2.1.12]	CG-1_01492	YL-1_01523
Gluconeogenesis/glycolysis	glcK	K25026	glucokinase [EC:2.7.1.2]	CG-1_00161
Gluconeogenesis/glycolysis	gpmB	K15634	2,3-bisphosphoglycerate-dependent phosphoglycerate mutase [EC:5.4.2.11]	CG-1_01379
Gluconeogenesis/glycolysis	pgi1	K06859	glucose-6-phosphate isomerase, archaeal [EC:5.3.1.9]	CG-1_01722	YL-1_00702
Gluconeogenesis/glycolysis	pgk	K00927	phosphoglycerate kinase [EC:2.7.2.3]	CG-1_01491	YL-1_01522
Gluconeogenesis/glycolysis	pmm-pgm	K15778	phosphomannomutase / phosphoglucomutase [EC:5.4.2.8 5.4.2.2]	CG-1_02085	YL-1_00492
Gluconeogenesis/glycolysis	tpiA	K01803	triosephosphate isomerase (TIM) [EC:5.3.1.1]	CG-1_02356	YL-1_01747
Methanogenesis	cdhE,acsC	K00197	acetyl-CoA decarbonylase/synthase, CODH/ACS complex subunit gamma [EC:2.1.1.245]		YL-1_02207
Methanogenesis	ftr	K00672	formylmethanofuran--tetrahydromethanopterin N-formyltransferase [EC:2.3.1.101]		YL-1_00925,YL-1_01437
Methanogenesis	fwdA,fmdA	K00200	formylmethanofuran dehydrogenase subunit A [EC:1.2.7.12]		YL-1_00929
Methanogenesis	fwdB,fmdB	K00201	formylmethanofuran dehydrogenase subunit B [EC:1.2.7.12]		YL-1_00930,YL-1_01599
Methanogenesis	fwdC,fmdC	K00202	formylmethanofuran dehydrogenase subunit C [EC:1.2.7.12]		YL-1_00928
Methanogenesis	fwdD,fmdD	K00203	formylmethanofuran dehydrogenase subunit D [EC:1.2.7.12]		YL-1_00931,YL-1_01598
Methanogenesis	fwdF,fmdF	K00205	4Fe-4S ferredoxin		YL-1_01602
Methanogenesis	fwdG	K11260	4Fe-4S ferredoxin		YL-1_01600
Methanogenesis	mch	K01499	methenyltetrahydromethanopterin cyclohydrolase [EC:3.5.4.27]	CG-1_00134	YL-1_01618
Methanogenesis	mer	K00320	5,10-methylenetetrahydromethanopterin reductase [EC:1.5.98.2]	CG-1_00410,CG-1_00581,CG-1_00694,CG-1_01032	YL-1_00098,YL-1_00327,YL-1_00479,YL-1_01210
Methanogenesis	metF	K24042	methionine synthase / methylenetetrahydrofolate reductase (NADH) [EC:2.1.1.13 1.5.1.54]		YL-1_00333
Methanogenesis	mtd	K10714	methylene-tetrahydromethanopterin dehydrogenase [EC:1.5.1.-]		YL-1_01095
Methanogenesis	mtrH	K00584	tetrahydromethanopterin S-methyltransferase subunit H [EC:2.1.1.86]		YL-1_00535
Proprionate_assimilation	MCEE	K05606	methylmalonyl-CoA/ethylmalonyl-CoA epimerase [EC:5.1.99.1]	CG-1_00389	YL-1_01973
Proprionate_assimilation	mcmA1	K01848	methylmalonyl-CoA mutase, N-terminal domain [EC:5.4.99.2]	CG-1_01141,CG-1_01382,CG-1_01443	YL-1_00738,YL-1_00836,YL-1_00844,YL-1_02115
Proprionate_assimilation	mcmA2	K01849	methylmalonyl-CoA mutase, C-terminal domain [EC:5.4.99.2]	CG-1_01442	YL-1_00739,YL-1_00835
Proprionate_assimilation	pcc	K01966	propionyl-CoA carboxylase beta chain [EC:6.4.1.3 2.1.3.15]	CG-1_00236
TCA_cycle	IDH3	K00030	isocitrate dehydrogenase (NAD+) [EC:1.1.1.41]	CG-1_00351	YL-1_01101
TCA_cycle	acnA	K01681	aconitate hydratase [EC:4.2.1.3]	CG-1_00988,CG-1_01567
TCA_cycle	cs	K01647	citrate synthase [EC:2.3.3.1]	CG-1_02309
TCA_cycle	fumC	K01679	fumarate hydratase, class II [EC:4.2.1.2]	CG-1_01695
TCA_cycle	korA	K00174	2-oxoglutarate/2-oxoacid ferredoxin oxidoreductase subunit alpha [EC:1.2.7.3 1.2.7.11]	CG-1_00050,CG-1_00704,CG-1_01373	YL-1_00600
TCA_cycle	korB	K00175	2-oxoglutarate/2-oxoacid ferredoxin oxidoreductase subunit beta [EC:1.2.7.3 1.2.7.11]	CG-1_00049,CG-1_00705,CG-1_01374	YL-1_00601
TCA_cycle	korC	K00177	2-oxoglutarate ferredoxin oxidoreductase subunit gamma [EC:1.2.7.3]	CG-1_00706	YL-1_00602
TCA_cycle	korD	K00176	2-oxoglutarate ferredoxin oxidoreductase subunit delta [EC:1.2.7.3]	CG-1_00703	YL-1_00599
TCA_cycle	mdh	K00024	malate dehydrogenase [EC:1.1.1.37]	CG-1_01506	YL-1_01141
TCA_cycle	sucC	K01903	succinyl-CoA synthetase beta subunit [EC:6.2.1.5]	CG-1_02216	YL-1_01726
TCA_cycle	sucD	K01902	succinyl-CoA synthetase alpha subunit [EC:6.2.1.5]	CG-1_02217	YL-1_01725
Wood-Ljungdahl_pathway	cdhA	K00192	anaerobic carbon-monoxide dehydrogenase, CODH/ACS complex subunit alpha [EC:1.2.7.4]		YL-1_01553
Wood-Ljungdahl_pathway	cdhB	K00195	anaerobic carbon-monoxide dehydrogenase, CODH/ACS complex subunit epsilon		YL-1_01552
Wood-Ljungdahl_pathway	cdhC	K00193	acetyl-CoA decarbonylase/synthase, CODH/ACS complex subunit beta [EC:2.3.1.169]		YL-1_01551
Wood-Ljungdahl_pathway	cdhD,acsD	K00194	acetyl-CoA decarbonylase/synthase, CODH/ACS complex subunit delta [EC:2.1.1.245]		YL-1_02208
bc_complex	QcrB	K15879	cytochrome b-561	CG-1_01041
bc_complex	cytb6	K02635	cytochrome b6	CG-1_01040
bc_complex	cytC	NA	mono-heme cytochrome	CG-1_01037
etf_complex	etfA	K03522	electron transfer flavoprotein alpha subunit	CG-1_01792	YL-1_00420
etf_complex	etfB	K03521	electron transfer flavoprotein beta subunit	CG-1_01791	YL-1_00421
etf_complex	etfC	K08264	heterodisulfide reductase subunit D [EC:1.8.98.1]	CG-1_01793	YL-1_00422
fix_complex	fixA	K03522	electron transfer flavoprotein alpha subunit	CG-1_01072
fix_complex	fixB	K03521	electron transfer flavoprotein beta subunit	CG-1_01073
fix_complex	fixC	K00313	electron transfer flavoprotein-quinone oxidoreductase [EC:1.5.5.-]	CG-1_01075
fix_complex	fixX	K03855	ferredoxin like protein	CG-1_01074

## Sheet: Suppl. Table 5
Genes	Node	Copies	Duplications	Losses	Originations	Singletons	Transfers
K00024	29	0	0	0	0	0	0
K00024	30	0	0	0	0	0	0
K00024	31	0	0	0	0	0	0
K00024	32	0	0	0	0	0	0
K00024	33	0	0	0	0	0	0
K00024	34	0	0	0	0	0	0
K00024	35	0	0	0	0	0	0
K00024	36	0	0	0	0	0	0
K00024	37	0	0	1	0	0	0
K00024	38	1	0	0	0	1	0
K00024	39	1	0	0	0	1	0
K00024	40	1	0	0	0	1	0
K00024	41	1	0	0	0	1	0
K00024	42	1	0	0	0	1	0
K00024	43	0	0	0	0	0	0
K00024	44	0	0	0	0	0	0
K00024	45	1	0	0	0	1	0
K00024	46	1	0	0	0	1	0
K00024	47	1	0	0	0	1	0
K00024	48	0	0	0	0	0	0
K00024	49	0	0	0	0	0	0
K00024	50	0	0	0	0	0	0
K00024	51	0	0	0	0	0	0
K00024	52	0	0	0	0	0	0
K00024	53	0	0	0	0	0	0
K00024	54	0	0	1	0	0	0
K00024	55	1	0	0	0	1	0
K00024	56	1	0	0	1	1	0
K00024	GB_GCA_001766815.1(0)	0	0	0	0	0	0
K00024	GB_GCA_001766825.1(1)	0	0	0	0	0	0
K00024	GB_GCA_003194425.1(2)	0	0	0	0	0	0
K00024	GB_GCA_003336485.1(3)	0	0	0	0	0	0
K00024	GB_GCA_003661125.1(4)	0	0	0	0	0	0
K00024	GB_GCA_011049045.1(5)	0	0	0	0	0	0
K00024	GB_GCA_013180605.1(6)	0	0	0	0	0	0
K00024	GB_GCA_013374505.1(7)	0	0	0	0	0	0
K00024	GB_GCA_014859735.1(8)	0	0	0	0	0	0
K00024	GB_GCA_016782355.1(9)	0	0	0	0	0	0
K00024	GB_GCA_017883965.1(10)	0	0	0	0	0	0
K00024	GB_GCA_021159465.1(11)	0	0	0	0	0	0
K00024	GB_GCA_023131215.1(12)	0	0	0	0	0	0
K00024	GB_GCA_023659785.1(13)	0	0	0	0	0	0
K00024	GB_GCA_024699715.1(14)	0	0	0	0	0	0
K00024	GB_GCA_026134025.1(15)	0	0	0	0	0	0
K00024	GB_GCA_026134085.1(16)	0	0	0	0	0	0
K00024	GB_GCA_029259535.1(17)	0	0	0	0	0	0
K00024	GB_GCA_029259545.1(18)	0	0	0	0	0	0
K00024	GB_GCA_030605385.1(19)	0	0	0	0	0	0
K00024	GB_GCA_030643285.1(20)	1	0	0	0	1	0
K00024	CG-1(21)	1	0	0	0	1	0
K00024	CG-2.new(22)	0	0	1	0	0	0
K00024	MW-1(23)	0	0	1	0	0	0
K00024	YL-2(24)	1	0	0	0	1	0
K00024	YL-1(25)	1	0	0	0	1	0
K00024	CM-1(26)	1	0	0	0	1	0
K00024	spire_mag_02087375(27)	0	0	1	0	0	0
K00024	spire_mag_02087448(28)	1	0	0	0	1	0
K00030	29	0	0	0	0	0	0
K00030	30	0	0	0	0	0	0
K00030	31	0	0	1	0	0	0
K00030	32	1	0	0	0	1	0
K00030	33	1	0	0	0	1	0
K00030	34	1	0	0	0	1	0
K00030	35	0	0	1	0	0	0
K00030	36	0	0	1	0	0	0
K00030	37	0	0	0	0	0	0
K00030	38	0	0	0	0	0	0
K00030	39	1	0	0	0	1	0
K00030	40	1	0	0	0	1	0
K00030	41	1	0	0	0	1	0
K00030	42	0	0	0	0	0	0
K00030	43	1	0	0	0	1	0
K00030	44	1	0	0	0	1	0
K00030	45	0	0	0.17	0	0	0
K00030	46	1	0	0	0	1	0
K00030	47	1	0	0	0	1	0
K00030	48	1	0	0	0	1	0
K00030	49	1	0	0	0	1	0
K00030	50	1	0	0	0	1	0
K00030	51	1	0	0	0	1	0
K00030	52	1	0	0	0	1	0
K00030	53	1	0	0	0	1	0
K00030	54	1	0	0	0	1	0
K00030	55	1	0	0	0.83	1	0
K00030	56	0.17	0	0	0.17	0.17	0
K00030	GB_GCA_001766815.1(0)	0	0	0	0	0	0
K00030	GB_GCA_001766825.1(1)	0	0	0	0	0	0
K00030	GB_GCA_003194425.1(2)	1	0	0	0	1	0
K00030	GB_GCA_003336485.1(3)	0	0	1	0	0	0
K00030	GB_GCA_003661125.1(4)	0	0	1	0	0	0
K00030	GB_GCA_011049045.1(5)	0	0	0	0	0	0
K00030	GB_GCA_013180605.1(6)	0	0	1	0	0	0
K00030	GB_GCA_013374505.1(7)	0	0	1	0	0	0
K00030	GB_GCA_014859735.1(8)	0	0	0	0	0	0
K00030	GB_GCA_016782355.1(9)	0	0	1	0	0	0
K00030	GB_GCA_017883965.1(10)	1	0	0	0	1	0
K00030	GB_GCA_021159465.1(11)	1	0	0	0	1	0
K00030	GB_GCA_023131215.1(12)	0	0	1	0	0	0
K00030	GB_GCA_023659785.1(13)	1	0	0	0	1	0
K00030	GB_GCA_024699715.1(14)	0	0	0	0	0	0
K00030	GB_GCA_026134025.1(15)	0	0	0	0	0	0
K00030	GB_GCA_026134085.1(16)	0	0	0	0	0	0
K00030	GB_GCA_029259535.1(17)	0	0	0	0	0	0
K00030	GB_GCA_029259545.1(18)	0	0	0	0	0	0
K00030	GB_GCA_030605385.1(19)	0	0	0	0	0	0
K00030	GB_GCA_030643285.1(20)	0	0	0	0	0	0
K00030	CG-1(21)	1	0	0	0	1	0
K00030	CG-2.new(22)	1	0	0	0	1	0
K00030	MW-1(23)	0	0	1	0	0	0
K00030	YL-2(24)	1	0	0	0	1	0
K00030	YL-1(25)	1	0	0	0	1	0
K00030	CM-1(26)	1	0	0	0	1	0
K00030	spire_mag_02087375(27)	0	0	0	0	0	0
K00030	spire_mag_02087448(28)	0	0	0	0	0	0
K00031	29	1.01	0	0.02	0	0.98	0.03
K00031	30	1	0	0.01	0.09	0.51	0.67
K00031	31	0.98	0	0.02	0.12	0.57	0.53
K00031	32	0.74	0	0.01	0.06	0.73	0.03
K00031	33	0.15	0	0.01	0	0.06	0.12
K00031	34	0.35	0	0.09	0.07	0.31	0.05
K00031	35	0	0	0.01	0	0	0
K00031	36	0	0	0	0	0	0
K00031	37	0.25	0	0	0.03	0.07	0.19
K00031	38	0.02	0	0.01	0	0.01	0.02
K00031	39	0	0	0.02	0	0	0
K00031	40	0.02	0	0.02	0	0	0.03
K00031	41	0	0	0.01	0	0	0.01
K00031	42	0.01	0	0.02	0	0.01	0
K00031	43	0.66	0	0	0.16	0.36	0.36
K00031	44	0.32	0	0	0.08	0.17	0.17
K00031	45	0.03	0	0	0.01	0.02	0.02
K00031	46	0.01	0	0	0.01	0.01	0
K00031	47	0	0	0.01	0	0	0.01
K00031	48	0.14	0	0.01	0.08	0.12	0.02
K00031	49	0.05	0	0.02	0.01	0.03	0.03
K00031	50	0.03	0	0.05	0.01	0.03	0
K00031	51	0.07	0	0	0.01	0.06	0.02
K00031	52	0.04	0	0.01	0.04	0.04	0
K00031	53	0.01	0	0	0.01	0.01	0
K00031	54	0	0	0	0	0	0
K00031	55	0	0	0	0	0	0
K00031	56	0	0	0	0	0	0
K00031	GB_GCA_001766815.1(0)	1	0	0.02	0	0.99	0.01
K00031	GB_GCA_001766825.1(1)	1	0	0.02	0	0.99	0.02
K00031	GB_GCA_003194425.1(2)	0	0	0.16	0.01	0	0.01
K00031	GB_GCA_003336485.1(3)	1	0	0.01	0.04	0.62	0.65
K00031	GB_GCA_003661125.1(4)	1	0	0.01	0.02	0.74	0.33
K00031	GB_GCA_011049045.1(5)	1	0	0.04	0	0.97	0.06
K00031	GB_GCA_013180605.1(6)	1	0	0.03	0.01	0.79	0.28
K00031	GB_GCA_013374505.1(7)	1	0	0	0.09	0.44	0.76
K00031	GB_GCA_014859735.1(8)	1	0	0.02	0.01	1	0.03
K00031	GB_GCA_016782355.1(9)	0	0	0.05	0	0	0.02
K00031	GB_GCA_017883965.1(10)	0	0	0.37	0	0	0.02
K00031	GB_GCA_021159465.1(11)	0	0	0.16	0.01	0	0
K00031	GB_GCA_023131215.1(12)	0	0	0.08	0	0	0.03
K00031	GB_GCA_023659785.1(13)	0	0	0.75	0	0	0.01
K00031	GB_GCA_024699715.1(14)	0	0	0	0	0	0
K00031	GB_GCA_026134025.1(15)	1	0	0.01	0	1	0
K00031	GB_GCA_026134085.1(16)	0	0	0	0	0	0
K00031	GB_GCA_029259535.1(17)	0	0	0.01	0.01	0	0
K00031	GB_GCA_029259545.1(18)	0	0	0.01	0	0	0.01
K00031	GB_GCA_030605385.1(19)	0	0	0.25	0	0	0
K00031	GB_GCA_030643285.1(20)	0	0	0.02	0	0	0
K00031	CG-1(21)	0	0	0	0	0	0
K00031	CG-2.new(22)	0	0	0.01	0	0	0
K00031	MW-1(23)	0	0	0.05	0.01	0	0.02
K00031	YL-2(24)	0	0	0	0	0	0
K00031	YL-1(25)	0	0	0.01	0	0	0.01
K00031	CM-1(26)	0	0	0.02	0	0	0.02
K00031	spire_mag_02087375(27)	0	0	0.02	0	0	0
K00031	spire_mag_02087448(28)	0	0	0.02	0	0	0.01
K00074	29	1.14	0	0	0	1.09	0.05
K00074	30	1.09	0	0.04	0.02	0.92	0.28
K00074	31	1.01	0.01	0.01	0	1	0
K00074	32	1	0	0.98	0	0.17	0.85
K00074	33	1	0	0.01	0	1	0
K00074	34	1.01	0	0.01	0	1	0.01
K00074	35	1.01	0	0.02	0	1.01	0.01
K00074	36	2.49	0.43	0.02	0.33	1.13	0.63
K00074	37	0.83	0.01	0	0.03	0.54	0.31
K00074	38	0.6	0.01	0.01	0	0.46	0.15
K00074	39	2	0	0	0	1.99	0.01
K00074	40	1.99	0	0	0	1.99	0
K00074	41	2	0	0.01	0	1.97	0.04
K00074	42	0.45	0	0.05	0.01	0.44	0.01
K00074	43	1.13	0	0.03	0	1.03	0.11
K00074	44	1.01	0	0	0	1.01	0
K00074	45	0.48	0	0	0.01	0.46	0.02
K00074	46	1.99	0	0	0	1.98	0.02
K00074	47	1.97	0.58	0	0.02	0.64	0.39
K00074	48	1.05	0	0.02	0	1.03	0.02
K00074	49	1.05	0	0	0	1.02	0.04
K00074	50	1.01	0	0.01	0	1	0.01
K00074	51	1.01	0	0	0	1.01	0
K00074	52	1.01	0	0.01	0	1.01	0
K00074	53	1.02	0.02	0.26	0	0.89	0.14
K00074	54	1.12	0.02	0.02	0.03	0.98	0.11
K00074	55	0.98	0.1	0	0.08	0.47	0.35
K00074	56	0.45	0	0	0.45	0.45	0
K00074	GB_GCA_001766815.1(0)	2	0	0	0	1.18	0.86
K00074	GB_GCA_001766825.1(1)	1	0	0.11	0	1	0.02
K00074	GB_GCA_003194425.1(2)	1	0	0.05	0	1	0
K00074	GB_GCA_003336485.1(3)	1	0	0.01	0	1	0
K00074	GB_GCA_003661125.1(4)	1	0	0.15	0	0.98	0.02
K00074	GB_GCA_011049045.1(5)	1	0	0.01	0	1	0
K00074	GB_GCA_013180605.1(6)	1	0	0.01	0	1	0.01
K00074	GB_GCA_013374505.1(7)	1	0	0	0	1	0
K00074	GB_GCA_014859735.1(8)	1	0	0.01	0	1	0
K00074	GB_GCA_016782355.1(9)	0	0	1.01	0	0	0
K00074	GB_GCA_017883965.1(10)	1	0	0.02	0	1	0.01
K00074	GB_GCA_021159465.1(11)	1	0	0	0	1	0
K00074	GB_GCA_023131215.1(12)	1	0	1.03	0	0.06	0.98
K00074	GB_GCA_023659785.1(13)	1	0	0.02	0	1	0.02
K00074	GB_GCA_024699715.1(14)	1	0	0.01	0	1	0
K00074	GB_GCA_026134025.1(15)	1	0	0.14	0	1	0
K00074	GB_GCA_026134085.1(16)	1	0	0.01	0	1	0
K00074	GB_GCA_029259535.1(17)	3	0.1	0.03	0.01	2.52	0.43
K00074	GB_GCA_029259545.1(18)	2	0.05	0.57	0	1.92	0.03
K00074	GB_GCA_030605385.1(19)	2	0.98	0.47	0.01	0.05	0.65
K00074	GB_GCA_030643285.1(20)	0	0	0.62	0	0	0.02
K00074	CG-1(21)	2	0	0.01	0	2	0.01
K00074	CG-2.new(22)	2	0.01	0.01	0	1.99	0.01
K00074	MW-1(23)	0	0	2	0	0	0.01
K00074	YL-2(24)	2	0	0.01	0	2	0.01
K00074	YL-1(25)	2	0	0	0	2	0
K00074	CM-1(26)	2	0	0.02	0	1.99	0.02
K00074	spire_mag_02087375(27)	1	0	0.01	0	0.59	0.41
K00074	spire_mag_02087448(28)	0	0	0.47	0	0	0.02
K00134	29	1.02	0	0	0	1.01	0.01
K00134	30	1.01	0	0.01	0	1	0.01
K00134	31	1.02	0	0.01	0	1.01	0.01
K00134	32	1.07	0	0.01	0	1.03	0.04
K00134	33	1.01	0	0	0	0.99	0.02
K00134	34	1.02	0	0.01	0	1	0.02
K00134	35	1.08	0	0.01	0	0.95	0.16
K00134	36	1.04	0	0	0	0.94	0.12
K00134	37	1.01	0	0.01	0	1	0.03
K00134	38	1.04	0	0.02	0	0.99	0.05
K00134	39	1.29	0	0	0	1.16	0.14
K00134	40	1.15	0	0.01	0	1.05	0.1
K00134	41	0.97	0	0	0	0.93	0.04
K00134	42	1.01	0	0	0	0.99	0.02
K00134	43	1.04	0	0.04	0	0.97	0.07
K00134	44	1.01	0	0	0	1	0.01
K00134	45	0.99	0	0	0	0.34	0.99
K00134	46	1.06	0.01	0	0	0.95	0.12
K00134	47	0.93	0	0	0	0.84	0.15
K00134	48	1.01	0	0.02	0	1	0.02
K00134	49	1.01	0	0	0	1	0.01
K00134	50	1	0	0	0	1	0
K00134	51	1	0	0	0.01	1	0
K00134	52	0.99	0	0.92	0.98	0.99	0
K00134	53	0.93	0	0	0.01	0.93	0
K00134	54	0.92	0	0	0	0.79	0.14
K00134	55	0.78	0	0	0	0.01	0.78
K00134	56	0	0	0	0	0	0
K00134	GB_GCA_001766815.1(0)	1	0	0.06	0	1	0.04
K00134	GB_GCA_001766825.1(1)	1	0	0.11	0	1	0.1
K00134	GB_GCA_003194425.1(2)	1	0	0.09	0	0.94	0.08
K00134	GB_GCA_003336485.1(3)	1	0	0.04	0	1	0.03
K00134	GB_GCA_003661125.1(4)	1	0	0.08	0	1	0.04
K00134	GB_GCA_011049045.1(5)	1	0	0.03	0	1	0.01
K00134	GB_GCA_013180605.1(6)	1	0	0.11	0	1	0.04
K00134	GB_GCA_013374505.1(7)	1	0	0.07	0	1	0.06
K00134	GB_GCA_014859735.1(8)	1	0	0.04	0	1	0.02
K00134	GB_GCA_016782355.1(9)	1	0	0.17	0	1	0.17
K00134	GB_GCA_017883965.1(10)	1	0	0.04	0	1	0.02
K00134	GB_GCA_021159465.1(11)	1	0	0.03	0	1	0.02
K00134	GB_GCA_023131215.1(12)	1	0	0.32	0	0.83	0.31
K00134	GB_GCA_023659785.1(13)	1	0	0.15	0	1	0.08
K00134	GB_GCA_024699715.1(14)	1	0	0.12	0	1	0.04
K00134	GB_GCA_026134025.1(15)	1	0	0.07	0	1	0.05
K00134	GB_GCA_026134085.1(16)	1	0	0.14	0	0.99	0.06
K00134	GB_GCA_029259535.1(17)	1	0	0.07	0	0.99	0.03
K00134	GB_GCA_029259545.1(18)	1	0	0.12	0	0.99	0.08
K00134	GB_GCA_030605385.1(19)	1	0	0.1	0	0.97	0.09
K00134	GB_GCA_030643285.1(20)	0	0	1.18	0	0	0.14
K00134	CG-1(21)	1	0	0.33	0	1	0.04
K00134	CG-2.new(22)	1	0	0.16	0	0.98	0.1
K00134	MW-1(23)	0	0	1.34	0	0	0.19
K00134	YL-2(24)	0	0	1.03	0	0	0.06
K00134	YL-1(25)	1	0	0.04	0	0.98	0.07
K00134	CM-1(26)	2	0	0.09	0	1.25	0.8
K00134	spire_mag_02087375(27)	1	0	0.1	0	0.99	0.06
K00134	spire_mag_02087448(28)	1	0	0.03	0	1	0.02
K00174	29	0	0	0	0	0	0
K00174	30	0	0	0	0	0	0
K00174	31	0.05	0	0	0.03	0.03	0.02
K00174	32	0	0	0	0	0	0
K00174	33	0	0	0	0	0	0
K00174	34	0	0	0	0	0	0
K00174	35	0	0	0	0	0	0
K00174	36	0	0	0	0	0	0
K00174	37	0	0	0	0	0	0
K00174	38	3.87	0.09	0	0.18	3.34	0.64
K00174	39	3.02	0.01	0	0	2.99	0.02
K00174	40	2.99	0.01	0	0	2.96	0.01
K00174	41	1.02	0	0.02	0	1.02	0
K00174	42	2.96	1.82	0	0.35	0.6	0.79
K00174	43	0	0	0	0	0	0
K00174	44	0	0	0	0	0	0
K00174	45	0	0	0	0	0	0
K00174	46	2.97	0.72	0	0.28	1.82	0.93
K00174	47	1.04	0	0	0.04	0.08	1
K00174	48	0	0	0	0	0	0
K00174	49	0	0	0	0	0	0
K00174	50	0	0	0	0	0	0
K00174	51	0	0	0	0	0	0
K00174	52	0	0	0	0	0	0
K00174	53	0	0	0	0	0	0
K00174	54	0	0	0	0	0	0
K00174	55	0	0	0	0	0	0
K00174	56	0	0	0	0	0	0
K00174	GB_GCA_001766815.1(0)	0	0	0	0	0	0
K00174	GB_GCA_001766825.1(1)	0	0	0	0	0	0
K00174	GB_GCA_003194425.1(2)	0	0	0	0	0	0
K00174	GB_GCA_003336485.1(3)	0	0	0	0	0	0
K00174	GB_GCA_003661125.1(4)	0	0	0	0	0	0
K00174	GB_GCA_011049045.1(5)	1	0.01	0.01	0.11	0.54	0.84
K00174	GB_GCA_013180605.1(6)	0	0	0.02	0	0	0.02
K00174	GB_GCA_013374505.1(7)	0	0	0	0	0	0
K00174	GB_GCA_014859735.1(8)	0	0	0.05	0	0	0
K00174	GB_GCA_016782355.1(9)	0	0	0	0	0	0
K00174	GB_GCA_017883965.1(10)	0	0	0.01	0	0	0.01
K00174	GB_GCA_021159465.1(11)	0	0	0	0	0	0
K00174	GB_GCA_023131215.1(12)	0	0	0.02	0	0	0.02
K00174	GB_GCA_023659785.1(13)	0	0	0	0	0	0
K00174	GB_GCA_024699715.1(14)	0	0	0	0	0	0
K00174	GB_GCA_026134025.1(15)	0	0	0	0	0	0
K00174	GB_GCA_026134085.1(16)	0	0	0	0	0	0
K00174	GB_GCA_029259535.1(17)	0	0	0	0	0	0
K00174	GB_GCA_029259545.1(18)	0	0	0.01	0	0	0.01
K00174	GB_GCA_030605385.1(19)	0	0	0	0	0	0
K00174	GB_GCA_030643285.1(20)	3	0.01	0.94	0	2.95	0.06
K00174	CG-1(21)	3	0	0.02	0	3	0
K00174	CG-2.new(22)	3	0.01	0.02	0	2.96	0.04
K00174	MW-1(23)	0	0	3	0	0	0.01
K00174	YL-2(24)	1	0	0.02	0	1	0
K00174	YL-1(25)	1	0	0.02	0	1	0
K00174	CM-1(26)	3	0	0.02	0	3	0
K00174	spire_mag_02087375(27)	4	0	0.03	0.01	3.85	0.15
K00174	spire_mag_02087448(28)	2	0	1	0	1.96	0.04
K00175	29	0	0	0	0	0	0
K00175	30	0	0	0	0	0	0
K00175	31	0.09	0	0	0.01	0.03	0.08
K00175	32	0	0	0	0	0	0
K00175	33	0	0	0	0	0	0
K00175	34	0	0	0	0	0	0
K00175	35	0	0	0	0	0	0
K00175	36	0	0	0	0	0	0
K00175	37	0	0	0	0	0	0
K00175	38	3.48	0.15	0.01	0.2	2.82	0.65
K00175	39	3.01	0	0	0	3	0.02
K00175	40	2.99	0	0	0	2.98	0.02
K00175	41	1.03	0.01	0.04	0	0.98	0.06
K00175	42	2.49	1.39	0	0.36	0.34	0.74
K00175	43	0	0	0	0	0	0
K00175	44	0	0	0	0	0	0
K00175	45	0	0	0	0	0	0
K00175	46	2.97	1.11	0	0.16	1.44	0.7
K00175	47	1	0.03	0	0.23	0.31	0.74
K00175	48	0	0	0	0	0	0
K00175	49	0	0	0	0	0	0
K00175	50	0	0	0	0	0	0
K00175	51	0	0	0	0	0	0
K00175	52	0	0	0	0	0	0
K00175	53	0	0	0	0	0	0
K00175	54	0	0	0	0	0	0
K00175	55	0	0	0	0	0	0
K00175	56	0	0	0	0	0	0
K00175	GB_GCA_001766815.1(0)	0	0	0	0	0	0
K00175	GB_GCA_001766825.1(1)	0	0	0.01	0	0	0.01
K00175	GB_GCA_003194425.1(2)	0	0	0	0	0	0
K00175	GB_GCA_003336485.1(3)	0	0	0	0	0	0
K00175	GB_GCA_003661125.1(4)	0	0	0	0	0	0
K00175	GB_GCA_011049045.1(5)	1	0	0	0.03	0.39	0.88
K00175	GB_GCA_013180605.1(6)	0	0	0	0	0	0
K00175	GB_GCA_013374505.1(7)	0	0	0	0	0	0
K00175	GB_GCA_014859735.1(8)	0	0	0.09	0	0	0
K00175	GB_GCA_016782355.1(9)	0	0	0	0	0	0
K00175	GB_GCA_017883965.1(10)	0	0	0	0	0	0
K00175	GB_GCA_021159465.1(11)	0	0	0	0	0	0
K00175	GB_GCA_023131215.1(12)	0	0	0	0	0	0
K00175	GB_GCA_023659785.1(13)	0	0	0.02	0	0	0.02
K00175	GB_GCA_024699715.1(14)	0	0	0	0	0	0
K00175	GB_GCA_026134025.1(15)	0	0	0	0	0	0
K00175	GB_GCA_026134085.1(16)	0	0	0.02	0.01	0	0.01
K00175	GB_GCA_029259535.1(17)	0	0	0	0	0	0
K00175	GB_GCA_029259545.1(18)	0	0	0	0	0	0
K00175	GB_GCA_030605385.1(19)	0	0	0.01	0	0	0.01
K00175	GB_GCA_030643285.1(20)	2	0.01	1.51	0	1.97	0.02
K00175	CG-1(21)	3	0	0.02	0	2.99	0.01
K00175	CG-2.new(22)	3	0.01	0.02	0	2.96	0.04
K00175	MW-1(23)	0	0	3.03	0	0	0.04
K00175	YL-2(24)	1	0	0.03	0	1	0
K00175	YL-1(25)	1	0	0.03	0	1	0
K00175	CM-1(26)	3	0	0.04	0	2.98	0.03
K00175	spire_mag_02087375(27)	4	0.01	0.04	0	3.67	0.55
K00175	spire_mag_02087448(28)	2	0.01	0.56	0	1.96	0.06
K00176	29	0	0	0	0	0	0
K00176	30	0	0	0	0	0	0
K00176	31	0	0	0	0	0	0
K00176	32	0	0	0	0	0	0
K00176	33	0	0	0	0	0	0
K00176	34	0	0	0	0	0	0
K00176	35	0	0	0	0	0	0
K00176	36	0	0	0	0	0	0
K00176	37	0	0	0	0	0	0
K00176	38	1.97	0.84	0	0.46	0.43	0.56
K00176	39	1.01	0.01	0	0	0.98	0.01
K00176	40	0.99	0	0.01	0	0.99	0
K00176	41	1	0	0	0	1	0
K00176	42	0.11	0.01	0	0.07	0.07	0.03
K00176	43	0	0	0	0	0	0
K00176	44	0	0	0	0	0	0
K00176	45	0	0	0	0	0	0
K00176	46	1	0	0	0	1	0
K00176	47	1	0	0	0.47	0.48	0.53
K00176	48	0	0	0	0	0	0
K00176	49	0	0	0	0	0	0
K00176	50	0	0	0	0	0	0
K00176	51	0	0	0	0	0	0
K00176	52	0	0	0	0	0	0
K00176	53	0	0	0	0	0	0
K00176	54	0	0	0	0	0	0
K00176	55	0	0	0	0	0	0
K00176	56	0	0	0	0	0	0
K00176	GB_GCA_001766815.1(0)	0	0	0	0	0	0
K00176	GB_GCA_001766825.1(1)	0	0	0	0	0	0
K00176	GB_GCA_003194425.1(2)	0	0	0	0	0	0
K00176	GB_GCA_003336485.1(3)	0	0	0	0	0	0
K00176	GB_GCA_003661125.1(4)	0	0	0	0	0	0
K00176	GB_GCA_011049045.1(5)	0	0	0	0	0	0
K00176	GB_GCA_013180605.1(6)	0	0	0	0	0	0
K00176	GB_GCA_013374505.1(7)	0	0	0	0	0	0
K00176	GB_GCA_014859735.1(8)	0	0	0	0	0	0
K00176	GB_GCA_016782355.1(9)	0	0	0	0	0	0
K00176	GB_GCA_017883965.1(10)	0	0	0	0	0	0
K00176	GB_GCA_021159465.1(11)	0	0	0	0	0	0
K00176	GB_GCA_023131215.1(12)	0	0	0	0	0	0
K00176	GB_GCA_023659785.1(13)	0	0	0	0	0	0
K00176	GB_GCA_024699715.1(14)	0	0	0	0	0	0
K00176	GB_GCA_026134025.1(15)	0	0	0	0	0	0
K00176	GB_GCA_026134085.1(16)	0	0	0	0	0	0
K00176	GB_GCA_029259535.1(17)	0	0	0	0	0	0
K00176	GB_GCA_029259545.1(18)	0	0	0	0	0	0
K00176	GB_GCA_030605385.1(19)	0	0	0	0	0	0
K00176	GB_GCA_030643285.1(20)	2	0.02	0.01	0	1.96	0.02
K00176	CG-1(21)	1	0	0.01	0	1	0
K00176	CG-2.new(22)	1	0	0	0	1	0
K00176	MW-1(23)	0	0	0.99	0	0	0
K00176	YL-2(24)	1	0	0	0	1	0
K00176	YL-1(25)	1	0	0	0	1	0
K00176	CM-1(26)	1	0	0.01	0	1	0
K00176	spire_mag_02087375(27)	2	0.02	0	0	1.97	0.01
K00176	spire_mag_02087448(28)	0	0	0.11	0	0	0
K00177	29	0	0	0	0	0	0
K00177	30	0	0	0	0	0	0
K00177	31	0	0	0	0	0	0
K00177	32	0	0	0	0	0	0
K00177	33	0	0	0	0	0	0
K00177	34	0	0	0	0	0	0
K00177	35	0	0	0	0	0	0
K00177	36	0	0	0	0	0	0
K00177	37	0	0	0	0	0	0
K00177	38	2.94	0.06	0	0.17	2.57	0.33
K00177	39	1	0	0	0	1	0
K00177	40	1	0	0	0	1	0
K00177	41	1	0	0	0	0.95	0.05
K00177	42	2.38	1.32	0	0.56	0.33	0.5
K00177	43	0	0	0	0	0	0
K00177	44	0	0	0	0	0	0
K00177	45	0	0	0	0	0	0
K00177	46	1	0	0	0.02	0.97	0.03
K00177	47	0.95	0	0	0.25	0.27	0.7
K00177	48	0	0	0	0	0	0
K00177	49	0	0	0	0	0	0
K00177	50	0	0	0	0	0	0
K00177	51	0	0	0	0	0	0
K00177	52	0	0	0	0	0	0
K00177	53	0	0	0	0	0	0
K00177	54	0	0	0	0	0	0
K00177	55	0	0	0	0	0	0
K00177	56	0	0	0	0	0	0
K00177	GB_GCA_001766815.1(0)	0	0	0	0	0	0
K00177	GB_GCA_001766825.1(1)	0	0	0	0	0	0
K00177	GB_GCA_003194425.1(2)	0	0	0	0	0	0
K00177	GB_GCA_003336485.1(3)	0	0	0	0	0	0
K00177	GB_GCA_003661125.1(4)	0	0	0	0	0	0
K00177	GB_GCA_011049045.1(5)	0	0	0	0	0	0
K00177	GB_GCA_013180605.1(6)	0	0	0	0	0	0
K00177	GB_GCA_013374505.1(7)	0	0	0	0	0	0
K00177	GB_GCA_014859735.1(8)	0	0	0	0	0	0
K00177	GB_GCA_016782355.1(9)	0	0	0	0	0	0
K00177	GB_GCA_017883965.1(10)	0	0	0	0	0	0
K00177	GB_GCA_021159465.1(11)	0	0	0	0	0	0
K00177	GB_GCA_023131215.1(12)	0	0	0	0	0	0
K00177	GB_GCA_023659785.1(13)	0	0	0	0	0	0
K00177	GB_GCA_024699715.1(14)	0	0	0	0	0	0
K00177	GB_GCA_026134025.1(15)	0	0	0	0	0	0
K00177	GB_GCA_026134085.1(16)	0	0	0	0	0	0
K00177	GB_GCA_029259535.1(17)	0	0	0	0	0	0
K00177	GB_GCA_029259545.1(18)	0	0	0	0	0	0
K00177	GB_GCA_030605385.1(19)	0	0	0	0	0	0
K00177	GB_GCA_030643285.1(20)	2	0	0.97	0	1.97	0.03
K00177	CG-1(21)	1	0	0.01	0	1	0.01
K00177	CG-2.new(22)	1	0	0	0	1	0
K00177	MW-1(23)	0	0	1	0	0	0
K00177	YL-2(24)	1	0	0	0	1	0
K00177	YL-1(25)	1	0	0	0	1	0
K00177	CM-1(26)	1	0	0	0	1	0
K00177	spire_mag_02087375(27)	3	0.04	0.03	0	2.92	0.05
K00177	spire_mag_02087448(28)	2	0.01	0.47	0	1.92	0.08
K00192	29	2.04	0	0.05	0	1.98	0.1
K00192	30	1.99	0	0.6	0.1	1.32	1.03
K00192	31	1.16	0	1.05	0	0.99	0.22
K00192	32	1.1	0	1.25	0.02	0.87	0.31
K00192	33	2	0	0.1	0	1.83	0.2
K00192	34	1.99	0	0.27	0.05	1.5	0.63
K00192	35	1.3	0	0.68	0	1.2	0.15
K00192	36	4.05	0	0.02	0.07	2.31	2.07
K00192	37	1.46	0	0.04	0.01	1.14	0.47
K00192	38	1.09	0	0.05	0	1.02	0.1
K00192	39	0.2	0	0.17	0	0.16	0.05
K00192	40	0.32	0	0.11	0.02	0.26	0.06
K00192	41	1	0	0.07	0	0.82	0.28
K00192	42	1.04	0	0.24	0	0.82	0.26
K00192	43	2.02	0	0.19	0	1.79	0.25
K00192	44	1.58	0	0.38	0.02	1.4	0.22
K00192	45	1.02	0	0.04	0.07	0.5	0.63
K00192	46	0.35	0	0.48	0	0.31	0.04
K00192	47	0.79	0	0.16	0.02	0.7	0.11
K00192	48	1.96	0	0.23	0.01	1.61	0.37
K00192	49	1.81	0	0.08	0	1.58	0.28
K00192	50	1.61	0	0.24	0	1.53	0.13
K00192	51	1.72	0	0.28	0	1.64	0.1
K00192	52	1.9	0	0.12	0.01	1.83	0.18
K00192	53	1.83	0	0.21	0	1.74	0.11
K00192	54	1.93	0	0	0.14	1.13	0.97
K00192	55	0.82	0	0.02	0.06	0.52	0.42
K00192	56	0.36	0	0	0.36	0.36	0
K00192	GB_GCA_001766815.1(0)	2	0	0.07	0	2	0.03
K00192	GB_GCA_001766825.1(1)	2	0	0.1	0	1.96	0.11
K00192	GB_GCA_003194425.1(2)	2	0	0.24	0	1.78	0.28
K00192	GB_GCA_003336485.1(3)	2	0	0.39	0	1.38	0.81
K00192	GB_GCA_003661125.1(4)	2	0	0.85	0	1.29	0.83
K00192	GB_GCA_011049045.1(5)	1	0	0.86	0	0.38	0.7
K00192	GB_GCA_013180605.1(6)	1	0	0.13	0	1	0.03
K00192	GB_GCA_013374505.1(7)	2	0	0.79	0	1.31	0.79
K00192	GB_GCA_014859735.1(8)	1	0	0.37	0	0.88	0.21
K00192	GB_GCA_016782355.1(9)	0	0	1.72	0.01	0	0.1
K00192	GB_GCA_017883965.1(10)	2	0	0.27	0	1.79	0.28
K00192	GB_GCA_021159465.1(11)	2	0	0.14	0	1.91	0.14
K00192	GB_GCA_023131215.1(12)	1	0	1.69	0	0.31	0.88
K00192	GB_GCA_023659785.1(13)	1	0	0.11	0	1	0.01
K00192	GB_GCA_024699715.1(14)	1	0	0.35	0	1	0.05
K00192	GB_GCA_026134025.1(15)	2	0	0.09	0	2	0.05
K00192	GB_GCA_026134085.1(16)	1	0	0.32	0	1	0.02
K00192	GB_GCA_029259535.1(17)	4	0	0.25	0	3.92	0.2
K00192	GB_GCA_029259545.1(18)	5	0	0.05	0.01	4.28	0.99
K00192	GB_GCA_030605385.1(19)	1	0	0.69	0	0.82	0.23
K00192	GB_GCA_030643285.1(20)	0	0	1.17	0	0	0.08
K00192	CG-1(21)	0	0	0.24	0	0	0.04
K00192	CG-2.new(22)	0	0	0.38	0	0	0.03
K00192	MW-1(23)	0	0	0.44	0	0	0.12
K00192	YL-2(24)	1	0	0.09	0	0.96	0.09
K00192	YL-1(25)	1	0	0.03	0.01	0.99	0.02
K00192	CM-1(26)	0	0	0.25	0	0	0.05
K00192	spire_mag_02087375(27)	1	0	0.12	0	0.99	0.03
K00192	spire_mag_02087448(28)	1	0	0.09	0.01	0.98	0.04
K00193	29	2.02	0	0	0.01	1.99	0.03
K00193	30	1.98	0	0.11	0.63	1.84	0.2
K00193	31	1.12	0	0.86	0	1.09	0.03
K00193	32	1.06	0	1.18	0	1.02	0.04
K00193	33	2.08	0	0.04	0	2.02	0.07
K00193	34	1.95	0	0.09	0	1.93	0.02
K00193	35	1.39	0	0.63	0	1.38	0.01
K00193	36	4	0	0.01	0.02	2.46	1.95
K00193	37	1.26	0	0	0.11	1.17	0.16
K00193	38	1.05	0	0.01	0	1.01	0.05
K00193	39	0.09	0	0.1	0	0.09	0.02
K00193	40	0.17	0	0.08	0.01	0.14	0.03
K00193	41	1	0	0.07	0.01	0.71	0.49
K00193	42	1.01	0	0.07	0	0.93	0.09
K00193	43	2.2	0	0.01	0	2.09	0.11
K00193	44	2.02	0	0.04	0	2.01	0.02
K00193	45	0.99	0	0.02	0.03	0.34	0.86
K00193	46	0.21	0	0.37	0	0.21	0.01
K00193	47	0.57	0	0.08	0	0.55	0.03
K00193	48	2.1	0	0.04	0	2.01	0.1
K00193	49	2.04	0	0.11	0	2.01	0.03
K00193	50	2.12	0	0.05	0	2.01	0.13
K00193	51	2.04	0	0.04	0	2.01	0.03
K00193	52	2.05	0	0.07	0	2.01	0.11
K00193	53	2.01	0	0.1	0	1.95	0.07
K00193	54	2.04	0	0.01	0.03	0.87	1.4
K00193	55	0.62	0	0	0.01	0.27	0.49
K00193	56	0.12	0	0	0.12	0.12	0
K00193	GB_GCA_001766815.1(0)	2	0	0.05	0	1.99	0.03
K00193	GB_GCA_001766825.1(1)	2	0	0.06	0	1.94	0.08
K00193	GB_GCA_003194425.1(2)	2	0	0.12	0	2	0.02
K00193	GB_GCA_003336485.1(3)	2	0	0.04	0	1.98	0.02
K00193	GB_GCA_003661125.1(4)	2	0	1.04	0	1.17	0.84
K00193	GB_GCA_011049045.1(5)	1	0	0.16	0	0.97	0.04
K00193	GB_GCA_013180605.1(6)	1	0	0.09	0	0.99	0.03
K00193	GB_GCA_013374505.1(7)	1	0	1.09	0	1	0.01
K00193	GB_GCA_014859735.1(8)	1	0	0.2	0	0.95	0.08
K00193	GB_GCA_016782355.1(9)	2	0	1.09	0.02	1.11	0.95
K00193	GB_GCA_017883965.1(10)	2	0	0.07	0	1.92	0.12
K00193	GB_GCA_021159465.1(11)	2	0	0.09	0	1.99	0.01
K00193	GB_GCA_023131215.1(12)	1	0	1.09	0	1	0.05
K00193	GB_GCA_023659785.1(13)	1	0	0.07	0	1	0.01
K00193	GB_GCA_024699715.1(14)	1	0	0.45	0	1	0.06
K00193	GB_GCA_026134025.1(15)	2	0	0.05	0	1.98	0.03
K00193	GB_GCA_026134085.1(16)	1	0	0.4	0	0.99	0.01
K00193	GB_GCA_029259535.1(17)	4	0	0.04	0	3.97	0.04
K00193	GB_GCA_029259545.1(18)	4	0	0.08	0	3.95	0.08
K00193	GB_GCA_030605385.1(19)	1	0	0.34	0	0.95	0.08
K00193	GB_GCA_030643285.1(20)	1	0	0.09	0	1	0.04
K00193	CG-1(21)	0	0	0.14	0	0	0.05
K00193	CG-2.new(22)	0	0	0.25	0	0	0.04
K00193	MW-1(23)	0	0	0.2	0	0	0.03
K00193	YL-2(24)	1	0	0.03	0	1	0.03
K00193	YL-1(25)	1	0	0.04	0	0.97	0.04
K00193	CM-1(26)	0	0	0.12	0	0	0.03
K00193	spire_mag_02087375(27)	1	0	0.07	0	1	0.02
K00193	spire_mag_02087448(28)	1	0	0.05	0	0.99	0.04
K00194	29	2	0	0	0	2	0
K00194	30	2	0	0.02	0	1.13	0.89
K00194	31	1	0	0.03	0	0.91	0.16
K00194	32	1	0	0.01	0	0.99	0.01
K00194	33	1.22	0	0	0	1.01	0.22
K00194	34	0.87	0	0.15	0	0.86	0.02
K00194	35	1	0	0	0	1	0
K00194	36	1.99	0	0	0	1.1	0.91
K00194	37	1.13	0	0.01	0.01	1	0.14
K00194	38	1	0	0	0	1	0
K00194	39	0	0	0.01	0	0	0
K00194	40	0.01	0	0	0	0.01	0
K00194	41	1	0	0	0	0.83	0.18
K00194	42	1	0	0.02	0	0.99	0.03
K00194	43	1	0	0.05	0	1	0
K00194	44	1	0	0	0	1	0
K00194	45	0.99	0	0.01	0.01	0.94	0.07
K00194	46	0.01	0	0.81	0	0.01	0
K00194	47	0.82	0	0.1	0	0.82	0
K00194	48	1.05	0	0	0	1.03	0.02
K00194	49	1.03	0	0	0	1.01	0.02
K00194	50	1.01	0	0	0	1	0.01
K00194	51	1	0	0	0	1	0
K00194	52	1	0	0	0	1	0
K00194	53	1	0	0.08	0	1	0
K00194	54	1.08	0	0.01	0.04	0.96	0.13
K00194	55	0.92	0	0	0	0.92	0
K00194	56	0.92	0	0	0.92	0.92	0
K00194	GB_GCA_001766815.1(0)	2	0	0	0	2	0
K00194	GB_GCA_001766825.1(1)	2	0	0.01	0	1.99	0.01
K00194	GB_GCA_003194425.1(2)	1	0	1	0	0.06	0.95
K00194	GB_GCA_003336485.1(3)	1	0	0	0	1	0
K00194	GB_GCA_003661125.1(4)	1	0	0	0	1	0
K00194	GB_GCA_011049045.1(5)	1	0	0.01	0	0.99	0.01
K00194	GB_GCA_013180605.1(6)	1	0	0.01	0	0.99	0.01
K00194	GB_GCA_013374505.1(7)	1	0	0.31	0	0.91	0.09
K00194	GB_GCA_014859735.1(8)	1	0	0	0	1	0
K00194	GB_GCA_016782355.1(9)	1	0	0.01	0	1	0
K00194	GB_GCA_017883965.1(10)	0	0	0.87	0	0	0
K00194	GB_GCA_021159465.1(11)	1	0	0.91	0	0.37	0.69
K00194	GB_GCA_023131215.1(12)	1	0	0.03	0	1	0
K00194	GB_GCA_023659785.1(13)	1	0	0	0	1	0
K00194	GB_GCA_024699715.1(14)	1	0	0	0	1	0
K00194	GB_GCA_026134025.1(15)	2	0	0	0	2	0
K00194	GB_GCA_026134085.1(16)	1	0	0	0	1	0
K00194	GB_GCA_029259535.1(17)	2	0	0.01	0	1.98	0.02
K00194	GB_GCA_029259545.1(18)	2	0	0.01	0	2	0.02
K00194	GB_GCA_030605385.1(19)	1	0	0.16	0.01	0.98	0.02
K00194	GB_GCA_030643285.1(20)	1	0	0.01	0.01	1	0
K00194	CG-1(21)	0	0	0	0	0	0
K00194	CG-2.new(22)	0	0	0.01	0	0	0
K00194	MW-1(23)	0	0	0.01	0	0	0
K00194	YL-2(24)	1	0	0.01	0	1	0.01
K00194	YL-1(25)	1	0	0	0	1	0
K00194	CM-1(26)	0	0	0	0	0	0
K00194	spire_mag_02087375(27)	1	0	0	0	1	0
K00194	spire_mag_02087448(28)	1	0	0.01	0	0.99	0.01
K00195	29	2.01	0	0.02	0.01	1.99	0.08
K00195	30	1.94	0	0.15	0.11	1.61	0.58
K00195	31	0.96	0	0.15	0	0.83	0.16
K00195	32	1.08	0	0.51	0	0.73	0.45
K00195	33	1.23	0	0.05	0.03	1	0.26
K00195	34	0.95	0	0.42	0.03	0.55	0.52
K00195	35	1	0	0.12	0	0.93	0.1
K00195	36	2.56	0	0.08	0.11	1.46	1.5
K00195	37	1.4	0	0.01	0.06	1.03	0.47
K00195	38	1.02	0	0.04	0	1.01	0.04
K00195	39	0.02	0	0.13	0	0.01	0.01
K00195	40	0.14	0	0.19	0	0.13	0.06
K00195	41	1.01	0	0.04	0	0.75	0.47
K00195	42	1.02	0	0.16	0	0.75	0.3
K00195	43	1.14	0	0.3	0.02	0.79	0.45
K00195	44	0.82	0	0.22	0.02	0.71	0.16
K00195	45	0.88	0	0.02	0.06	0.32	0.66
K00195	46	0.27	0	0.37	0	0.25	0.06
K00195	47	0.58	0	0.07	0	0.49	0.12
K00195	48	0.97	0	0.22	0	0.78	0.23
K00195	49	0.96	0	0.1	0.03	0.77	0.23
K00195	50	0.8	0	0.15	0.02	0.74	0.07
K00195	51	0.86	0	0.21	0.04	0.83	0.04
K00195	52	0.99	0	0.05	0	0.97	0.02
K00195	53	1.02	0	0.14	0.01	0.95	0.12
K00195	54	1.03	0	0	0.07	0.73	0.43
K00195	55	0.53	0	0	0.06	0.34	0.29
K00195	56	0.18	0	0	0.18	0.18	0
K00195	GB_GCA_001766815.1(0)	2	0	0.03	0	1.99	0.02
K00195	GB_GCA_001766825.1(1)	2	0	0.02	0.01	1.95	0.07
K00195	GB_GCA_003194425.1(2)	1	0	0.28	0	0.74	0.31
K00195	GB_GCA_003336485.1(3)	1	0	0.27	0	0.62	0.45
K00195	GB_GCA_003661125.1(4)	2	0	0.61	0.03	1.04	1.44
K00195	GB_GCA_011049045.1(5)	1	0	0.69	0.02	0.4	0.71
K00195	GB_GCA_013180605.1(6)	1	0	0.12	0	0.98	0.04
K00195	GB_GCA_013374505.1(7)	0	0	1.25	0	0	0.02
K00195	GB_GCA_014859735.1(8)	1	0	0.33	0.01	0.77	0.36
K00195	GB_GCA_016782355.1(9)	0	0	0.87	0	0	0.07
K00195	GB_GCA_017883965.1(10)	1	0	0.31	0.01	0.75	0.35
K00195	GB_GCA_021159465.1(11)	2	0	0.05	0.02	1.41	0.8
K00195	GB_GCA_023131215.1(12)	1	0	0.71	0.03	0.45	0.72
K00195	GB_GCA_023659785.1(13)	1	0	0.14	0	0.99	0.06
K00195	GB_GCA_024699715.1(14)	1	0	0.04	0	0.99	0.04
K00195	GB_GCA_026134025.1(15)	2	0	0.03	0	2	0.02
K00195	GB_GCA_026134085.1(16)	1	0	0.04	0	0.98	0.04
K00195	GB_GCA_029259535.1(17)	3	0	0.05	0.01	2.66	0.48
K00195	GB_GCA_029259545.1(18)	2	0	0.61	0	1.96	0.05
K00195	GB_GCA_030605385.1(19)	1	0	0.47	0	0.95	0.07
K00195	GB_GCA_030643285.1(20)	0	0	1.07	0	0	0.05
K00195	CG-1(21)	0	0	0.02	0	0	0
K00195	CG-2.new(22)	0	0	0.3	0	0	0.03
K00195	MW-1(23)	0	0	0.18	0	0	0.04
K00195	YL-2(24)	1	0	0.05	0	1	0.04
K00195	YL-1(25)	1	0	0.03	0	0.98	0.02
K00195	CM-1(26)	0	0	0.04	0	0	0.02
K00195	spire_mag_02087375(27)	1	0	0.04	0	0.99	0.02
K00195	spire_mag_02087448(28)	1	0	0.05	0	1	0.03
K00197	29	2.01	0	0	0	2	0.01
K00197	30	2	0.01	0.04	0.01	1.49	0.79
K00197	31	1.01	0	0.12	0	1	0.02
K00197	32	1.01	0	0	0	0.35	0.67
K00197	33	1.37	0.01	0.02	0.03	1.09	0.3
K00197	34	1.11	0	0	0	1.01	0.11
K00197	35	1.02	0	0.05	0	0.98	0.06
K00197	36	2.02	0.02	0.02	0.02	1.36	0.86
K00197	37	1.23	0.01	0.02	0	1.06	0.18
K00197	38	1.03	0.01	0.01	0	1.01	0
K00197	39	0.04	0	0.11	0	0.04	0
K00197	40	0.15	0	0.14	0	0.15	0
K00197	41	1	0	0.01	0.01	0.89	0.19
K00197	42	1.03	0	0.06	0.01	1.01	0.02
K00197	43	0.34	0	0.08	0	0.24	0.1
K00197	44	1	0	0.08	0	0.93	0.07
K00197	45	1.06	0.02	0	0.02	0.81	0.29
K00197	46	0.29	0	0.53	0	0.29	0.01
K00197	47	0.81	0	0.07	0	0.8	0.03
K00197	48	0.32	0	0.01	0.01	0.14	0.21
K00197	49	0.11	0	0.92	0	0.09	0.02
K00197	50	1.01	0	0.04	0	0.98	0.04
K00197	51	1.01	0	0.14	0	0.91	0.1
K00197	52	1.05	0.01	0.06	0.01	0.96	0.08
K00197	53	1.01	0.02	0.16	0	0.96	0.01
K00197	54	1.14	0.05	0.03	0.05	0.89	0.22
K00197	55	0.85	0.02	0	0.01	0.75	0.09
K00197	56	0.73	0.02	0	0.71	0.69	0
K00197	GB_GCA_001766815.1(0)	2	0	0.02	0	1.99	0.01
K00197	GB_GCA_001766825.1(1)	2	0	0.02	0	2	0.02
K00197	GB_GCA_003194425.1(2)	1	0	0.02	0	0.32	0.7
K00197	GB_GCA_003336485.1(3)	1	0	0.05	0	0.98	0.05
K00197	GB_GCA_003661125.1(4)	0	0	0.36	0	0	0.02
K00197	GB_GCA_011049045.1(5)	1	0	0.02	0	1	0.01
K00197	GB_GCA_013180605.1(6)	1	0	0.02	0	1	0.01
K00197	GB_GCA_013374505.1(7)	1	0	1.27	0	0.16	0.9
K00197	GB_GCA_014859735.1(8)	1	0	0.03	0	0.99	0.02
K00197	GB_GCA_016782355.1(9)	1	0	0.12	0	0.93	0.11
K00197	GB_GCA_017883965.1(10)	1	0.01	0.99	0	0.27	0.87
K00197	GB_GCA_021159465.1(11)	2	0.01	0.12	0.09	1.48	0.65
K00197	GB_GCA_023131215.1(12)	0	0	0.12	0	0	0.01
K00197	GB_GCA_023659785.1(13)	1	0.01	0.06	0	0.97	0.04
K00197	GB_GCA_024699715.1(14)	1	0	0.02	0	1	0
K00197	GB_GCA_026134025.1(15)	2	0	0.01	0	2	0
K00197	GB_GCA_026134085.1(16)	1	0	0.02	0	1	0
K00197	GB_GCA_029259535.1(17)	2	0	0.03	0	2	0.01
K00197	GB_GCA_029259545.1(18)	2	0.01	0.05	0	1.99	0.02
K00197	GB_GCA_030605385.1(19)	2	0.99	0.29	0.01	0.11	0.06
K00197	GB_GCA_030643285.1(20)	1	0	0.05	0	1	0.02
K00197	CG-1(21)	0	0	0.07	0	0	0.03
K00197	CG-2.new(22)	0	0	0.3	0	0	0.01
K00197	MW-1(23)	0	0	0.2	0.01	0	0.04
K00197	YL-2(24)	1	0	0.05	0	0.98	0.05
K00197	YL-1(25)	1	0	0.01	0	1	0.01
K00197	CM-1(26)	0	0	0.05	0	0	0.01
K00197	spire_mag_02087375(27)	1	0	0.03	0	1	0
K00197	spire_mag_02087448(28)	1	0	0.03	0	1	0
K00200	29	1	0	0	0	1	0
K00200	30	1	0	0.01	0	1	0
K00200	31	1.09	0	1.06	0	0.94	0.15
K00200	32	1.06	0.02	0.12	0	1.01	0.01
K00200	33	2.14	0	0.02	0	2.02	0.15
K00200	34	2	0	0.16	0	1.92	0.08
K00200	35	2	0	0	0	2	0
K00200	36	1.99	0	0.01	0	1.98	0.01
K00200	37	1.01	0	0	0	1	0.01
K00200	38	1.01	0.01	0	0	0.99	0
K00200	39	0.01	0	0.02	0	0.01	0
K00200	40	0.03	0	0.01	0	0.02	0.01
K00200	41	1.02	0.01	0	0	0.98	0.03
K00200	42	1	0	0	0	1	0
K00200	43	1.15	0	1.29	0	1.13	0.02
K00200	44	2.08	0	0.03	0	1.99	0.12
K00200	45	1	0	0.02	0	0.94	0.06
K00200	46	0.03	0	0.95	0	0.03	0
K00200	47	0.98	0.01	0.06	0	0.95	0.01
K00200	48	2.42	0	0.01	0	2.35	0.09
K00200	49	2.34	0.03	0.03	0	2.21	0.07
K00200	50	2.27	0.5	0.33	0.01	1.24	0.1
K00200	51	1.99	0	0.02	0	1.99	0
K00200	52	2.01	0.01	0	0	1.99	0
K00200	53	2	0	0.01	0	1.98	0.02
K00200	54	1.99	0.88	0	0.01	0.19	0.08
K00200	55	1.02	0.03	0	0.03	0.96	0
K00200	56	0.96	0.01	0	0.95	0.94	0
K00200	GB_GCA_001766815.1(0)	1	0	0	0	1	0
K00200	GB_GCA_001766825.1(1)	1	0	0.01	0	1	0.01
K00200	GB_GCA_003194425.1(2)	2	0	0.93	0	1.63	0.51
K00200	GB_GCA_003336485.1(3)	2	0	0.96	0	1.45	0.88
K00200	GB_GCA_003661125.1(4)	1	0	0.18	0	0.99	0.03
K00200	GB_GCA_011049045.1(5)	1	0	0.81	0	0.3	0.72
K00200	GB_GCA_013180605.1(6)	1	0	0.06	0	1	0
K00200	GB_GCA_013374505.1(7)	2	0.02	1.01	0	1.47	0.85
K00200	GB_GCA_014859735.1(8)	1	0	0.13	0	0.96	0.04
K00200	GB_GCA_016782355.1(9)	1	0.01	1.32	0	0.96	0.04
K00200	GB_GCA_017883965.1(10)	2	0	0.06	0	1.96	0.06
K00200	GB_GCA_021159465.1(11)	2	0	0.16	0	1.99	0.02
K00200	GB_GCA_023131215.1(12)	1	0	1.4	0	0.94	0.06
K00200	GB_GCA_023659785.1(13)	1	0	0.08	0	0.99	0.02
K00200	GB_GCA_024699715.1(14)	2	0	0	0	2	0
K00200	GB_GCA_026134025.1(15)	1	0	0	0	1	0
K00200	GB_GCA_026134085.1(16)	2	0	0	0	2	0
K00200	GB_GCA_029259535.1(17)	2	0	0	0	2	0.01
K00200	GB_GCA_029259545.1(18)	1	0	0.99	0	1	0
K00200	GB_GCA_030605385.1(19)	1	0	0.02	0	1	0.01
K00200	GB_GCA_030643285.1(20)	1	0	0.01	0	1	0
K00200	CG-1(21)	0	0	0.01	0	0	0
K00200	CG-2.new(22)	0	0	0.03	0	0	0
K00200	MW-1(23)	0	0	0.03	0	0	0
K00200	YL-2(24)	1	0.01	0.03	0	0.99	0
K00200	YL-1(25)	1	0	0.03	0	1	0.01
K00200	CM-1(26)	0	0	0.02	0	0	0.01
K00200	spire_mag_02087375(27)	1	0	0.03	0	1	0.02
K00200	spire_mag_02087448(28)	1	0	0	0	1	0
K00201	29	2.1	0.01	0.13	0.02	1.95	0.2
K00201	30	2	0.01	0.74	0.11	1.62	0.48
K00201	31	0.8	0	1.92	0	0.55	0.35
K00201	32	2.35	0.06	0.58	0	1.86	0.5
K00201	33	2.73	0.03	0.31	0	1.93	0.88
K00201	34	2.37	0	0.46	0	2.29	0.11
K00201	35	2.13	0.03	0.12	0	1.99	0.12
K00201	36	3.13	0.11	0.06	0.04	2.41	0.85
K00201	37	2.14	0	0.18	0.01	1.88	0.3
K00201	38	2.25	0.02	0.47	0	2.1	0.15
K00201	39	0.07	0	0.19	0	0.05	0.05
K00201	40	0.21	0	0.13	0	0.14	0.14
K00201	41	1.17	0.02	0.11	0.01	0.92	0.33
K00201	42	2.55	0.03	0.16	0.01	2.02	0.66
K00201	43	2.37	0.07	0.47	0	2.01	0.33
K00201	44	2.72	0	0.17	0	2.23	0.7
K00201	45	2.01	0.07	0.02	0.15	1.01	1.1
K00201	46	0.2	0	0.85	0	0.13	0.13
K00201	47	0.92	0	0.4	0	0.86	0.09
K00201	48	2.44	0.05	0.08	0	2.02	0.36
K00201	49	2.11	0.11	0.24	0	1.59	0.42
K00201	50	1.82	0.02	0.61	0	1.59	0.22
K00201	51	2.19	0.02	0.13	0.01	2.04	0.16
K00201	52	2.13	0.03	0.08	0	2	0.08
K00201	53	2.1	0.02	0.23	0.01	2	0.11
K00201	54	2.19	0.14	0.07	0.06	1.31	0.83
K00201	55	1.23	0.03	0.06	0.03	0.72	0.52
K00201	56	0.71	0.2	0	0.51	0.38	0
K00201	GB_GCA_001766815.1(0)	2	0	0.16	0	2	0.06
K00201	GB_GCA_001766825.1(1)	2	0	0.27	0	1.8	0.27
K00201	GB_GCA_003194425.1(2)	2	0	1.25	0	1.34	0.81
K00201	GB_GCA_003336485.1(3)	3	0.09	1.12	0	2.16	1.31
K00201	GB_GCA_003661125.1(4)	2	0.11	1.29	0	1.34	0.81
K00201	GB_GCA_011049045.1(5)	1	0	0.36	0	0.72	0.56
K00201	GB_GCA_013180605.1(6)	1	0.04	1.64	0	0.85	0.25
K00201	GB_GCA_013374505.1(7)	3	0.06	1.19	0	1.91	1.4
K00201	GB_GCA_014859735.1(8)	1	0.02	0.71	0	0.19	0.89
K00201	GB_GCA_016782355.1(9)	1	0.02	0.97	0	0.96	0.13
K00201	GB_GCA_017883965.1(10)	2	0	0.59	0	1.93	0.22
K00201	GB_GCA_021159465.1(11)	2	0	0.86	0	1.95	0.13
K00201	GB_GCA_023131215.1(12)	1	0.01	1.61	0	0.8	0.49
K00201	GB_GCA_023659785.1(13)	4	0.09	0.36	0	2.3	1.92
K00201	GB_GCA_024699715.1(14)	2	0	0.25	0	1.98	0.12
K00201	GB_GCA_026134025.1(15)	2	0.02	0.19	0	1.96	0.07
K00201	GB_GCA_026134085.1(16)	2	0	0.21	0	2	0.08
K00201	GB_GCA_029259535.1(17)	4	0.93	0.16	0	2.22	0.1
K00201	GB_GCA_029259545.1(18)	3	0	0.18	0	3	0.05
K00201	GB_GCA_030605385.1(19)	2	0.04	1.03	0	1.31	0.85
K00201	GB_GCA_030643285.1(20)	2	0	0.34	0	1.99	0.09
K00201	CG-1(21)	0	0	0.11	0	0	0.04
K00201	CG-2.new(22)	0	0	0.29	0	0	0.09
K00201	MW-1(23)	0	0	0.43	0	0	0.22
K00201	YL-2(24)	0	0	1.26	0	0	0.09
K00201	YL-1(25)	2	0	0.08	0.01	1.38	0.9
K00201	CM-1(26)	0	0	0.1	0	0	0.03
K00201	spire_mag_02087375(27)	2	0	0.33	0	1.99	0.08
K00201	spire_mag_02087448(28)	3	0.03	0.17	0.02	2.58	0.57
K00202	29	1	0	0.01	0	1	0
K00202	30	1.01	0	0.04	0	0.99	0.02
K00202	31	2	0	0.12	0	1.9	0.1
K00202	32	1.99	0	0.12	0	1.9	0.09
K00202	33	2.29	0	0.02	0.01	1.97	0.35
K00202	34	2.02	0	0.08	0	1.83	0.21
K00202	35	2.31	0	0.03	0	2.02	0.53
K00202	36	1.02	0	0.04	0	1	0.06
K00202	37	1.03	0	0.01	0	0.97	0.07
K00202	38	1.02	0	0	0	1	0.02
K00202	39	0	0	0.05	0	0	0
K00202	40	0.05	0	0.06	0	0.04	0.04
K00202	41	1.01	0	0	0	0.75	0.28
K00202	42	1	0	0.02	0.01	0.97	0.04
K00202	43	2.02	0	0.09	0	1.59	0.45
K00202	44	1.89	0	0.16	0	1.81	0.1
K00202	45	0.97	0	0	0.02	0.77	0.27
K00202	46	0.07	0	0.7	0	0.06	0.04
K00202	47	0.73	0	0.06	0.01	0.73	0.02
K00202	48	1.66	0	0.03	0	1.58	0.09
K00202	49	1.6	0	0.35	0.01	1.58	0.04
K00202	50	1.9	0	0.13	0	1.83	0.08
K00202	51	1.95	0	0.01	0.01	1.95	0
K00202	52	1.95	0	0.02	0.04	1.83	0.12
K00202	53	1.81	0	0	0.1	1.23	0.71
K00202	54	1	0	0	0.01	0.8	0.23
K00202	55	0.76	0	0	0.06	0.74	0.02
K00202	56	0.68	0	0	0.68	0.68	0
K00202	GB_GCA_001766815.1(0)	1	0	0.01	0	1	0.01
K00202	GB_GCA_001766825.1(1)	1	0	0.03	0.01	1	0.01
K00202	GB_GCA_003194425.1(2)	1	0	1.31	0	0.36	0.65
K00202	GB_GCA_003336485.1(3)	2	0	0.73	0	1.47	0.84
K00202	GB_GCA_003661125.1(4)	2	0	0.23	0	1.8	0.21
K00202	GB_GCA_011049045.1(5)	2	0	0.07	0	1.93	0.07
K00202	GB_GCA_013180605.1(6)	2	0	0.03	0	1.98	0.04
K00202	GB_GCA_013374505.1(7)	2	0	1.95	0	0.65	1.66
K00202	GB_GCA_014859735.1(8)	2	0	0.01	0	2	0.01
K00202	GB_GCA_016782355.1(9)	2	0	0.56	0	1.41	0.66
K00202	GB_GCA_017883965.1(10)	3	0	0.84	0.01	1.4	1.81
K00202	GB_GCA_021159465.1(11)	2	0	0.31	0	1.99	0.02
K00202	GB_GCA_023131215.1(12)	1	0	1.3	0	0.31	0.7
K00202	GB_GCA_023659785.1(13)	1	0	1.02	0	0.99	0.03
K00202	GB_GCA_024699715.1(14)	3	0	0.04	0	2.41	0.73
K00202	GB_GCA_026134025.1(15)	1	0	0	0	1	0
K00202	GB_GCA_026134085.1(16)	2	0	0.34	0.01	1.99	0.02
K00202	GB_GCA_029259535.1(17)	1	0	0.04	0	0.99	0.02
K00202	GB_GCA_029259545.1(18)	1	0	0.02	0	1	0
K00202	GB_GCA_030605385.1(19)	1	0	0.2	0	0.86	0.17
K00202	GB_GCA_030643285.1(20)	1	0	0.06	0	0.98	0.04
K00202	CG-1(21)	0	0	0.02	0	0	0.02
K00202	CG-2.new(22)	0	0	0.07	0	0	0
K00202	MW-1(23)	0	0	0.09	0	0	0.04
K00202	YL-2(24)	1	0	0.04	0.01	0.99	0.02
K00202	YL-1(25)	1	0	0.01	0	1	0
K00202	CM-1(26)	0	0	0.03	0	0	0.03
K00202	spire_mag_02087375(27)	1	0	0.07	0	0.97	0.05
K00202	spire_mag_02087448(28)	1	0	0.02	0	0.99	0.02
K00203	29	2	0	0.01	0	1.99	0.01
K00203	30	2	0	0.11	0.01	1.95	0.1
K00203	31	1.74	0	0.06	0	1.68	0.07
K00203	32	1.02	0	0.03	0	1.01	0.01
K00203	33	0.66	0	0.41	0	0.58	0.08
K00203	34	1.73	0	0.05	0	1.49	0.26
K00203	35	1	0	0.02	0	0.99	0.02
K00203	36	2.01	0	0.02	0.02	1.57	0.53
K00203	37	2	0	0.02	0.02	1.88	0.15
K00203	38	2.03	0	0.22	0	2.02	0.02
K00203	39	0.02	0	0.08	0	0.02	0
K00203	40	0.1	0	0.11	0	0.1	0
K00203	41	1.46	0	0.01	0.03	1.2	0.44
K00203	42	2.23	0	0.03	0.03	1.93	0.38
K00203	43	1.04	0	0.09	0	1.01	0.03
K00203	44	1.52	0	0.19	0	0.98	0.62
K00203	45	1.85	0	0	0.1	0.96	1.01
K00203	46	0.21	0	0.79	0	0.21	0
K00203	47	1	0	0.04	0	0.94	0.1
K00203	48	1.1	0	0.02	0	1.05	0.05
K00203	49	1.07	0	0.11	0	1.02	0.05
K00203	50	1.13	0	0.06	0	1.04	0.1
K00203	51	1.09	0	0.01	0	0.99	0.11
K00203	52	0.99	0	0.01	0	0.99	0
K00203	53	1	0	0.48	0	1	0
K00203	54	1.48	0	0.03	0.01	1.01	0.56
K00203	55	0.94	0	0.01	0	0.73	0.21
K00203	56	0.74	0	0	0.74	0.74	0
K00203	GB_GCA_001766815.1(0)	2	0	0	0	2	0
K00203	GB_GCA_001766825.1(1)	2	0	0.03	0	1.97	0.03
K00203	GB_GCA_003194425.1(2)	1	0	0.26	0	0.85	0.16
K00203	GB_GCA_003336485.1(3)	1	0	0.74	0	0.86	0.22
K00203	GB_GCA_003661125.1(4)	1	0	0.07	0	0.99	0.03
K00203	GB_GCA_011049045.1(5)	1	0	0.96	0	0.88	0.22
K00203	GB_GCA_013180605.1(6)	1	0	0.04	0	1	0.02
K00203	GB_GCA_013374505.1(7)	0	0	0.66	0	0	0
K00203	GB_GCA_014859735.1(8)	1	0	0.79	0	0.97	0.05
K00203	GB_GCA_016782355.1(9)	1	0	0.27	0	0.89	0.14
K00203	GB_GCA_017883965.1(10)	1	0	0.82	0	0.93	0.09
K00203	GB_GCA_021159465.1(11)	1	0	0.01	0	0.67	0.35
K00203	GB_GCA_023131215.1(12)	1	0	0.26	0	0.86	0.19
K00203	GB_GCA_023659785.1(13)	1	0	0.05	0.01	1	0.02
K00203	GB_GCA_024699715.1(14)	1	0	0.02	0	1	0.02
K00203	GB_GCA_026134025.1(15)	2	0	0	0	2	0
K00203	GB_GCA_026134085.1(16)	1	0	0.01	0	0.99	0.01
K00203	GB_GCA_029259535.1(17)	2	0	0.03	0	1.98	0.02
K00203	GB_GCA_029259545.1(18)	2	0	0.03	0	2	0.02
K00203	GB_GCA_030605385.1(19)	2	0	0.6	0.01	1.54	0.59
K00203	GB_GCA_030643285.1(20)	2	0	0.04	0	2	0.01
K00203	CG-1(21)	0	0	0.03	0	0	0.01
K00203	CG-2.new(22)	0	0	0.21	0	0	0
K00203	MW-1(23)	0	0	0.13	0	0	0.03
K00203	YL-2(24)	1	0	0.47	0.01	1	0
K00203	YL-1(25)	2	0	0.03	0.01	1.53	0.56
K00203	CM-1(26)	0	0	0.02	0	0	0
K00203	spire_mag_02087375(27)	2	0	0.03	0	2	0
K00203	spire_mag_02087448(28)	3	0	0.02	0	2.28	0.79
K00205	29	1	0	0.02	0	1	0
K00205	30	1.02	0	0.04	0	0.97	0.05
K00205	31	0	0	0	0	0	0
K00205	32	0.01	0	0	0	0.01	0
K00205	33	0.01	0	0.01	0	0.01	0
K00205	34	0	0	0	0	0	0
K00205	35	1	0	0	0.01	0.96	0.04
K00205	36	0.96	0	0.01	0	0.93	0.03
K00205	37	1.01	0	0.04	0	0.97	0.04
K00205	38	1.01	0	0.27	0	1.01	0
K00205	39	0.01	0	0.01	0	0.01	0
K00205	40	0.02	0	0.01	0	0.02	0
K00205	41	0.85	0	0	0	0.82	0.04
K00205	42	1.28	0	0	0.01	1.07	0.26
K00205	43	0.01	0	0	0	0.01	0
K00205	44	0	0	0.02	0	0	0
K00205	45	1.01	0	0	0.01	0.93	0.09
K00205	46	0.03	0	0.78	0	0.03	0
K00205	47	0.81	0	0.12	0	0.79	0.02
K00205	48	0.01	0	0.01	0	0.01	0
K00205	49	0.02	0	0	0	0.02	0
K00205	50	0.02	0	0.02	0.01	0.01	0.01
K00205	51	0.02	0	0	0	0.02	0
K00205	52	0.02	0	0.93	0	0.02	0
K00205	53	0.95	0	0.01	0	0.95	0.02
K00205	54	0.94	0	0.01	0.02	0.93	0.02
K00205	55	0.91	0	0.01	0.01	0.91	0
K00205	56	0.91	0	0	0.91	0.91	0
K00205	GB_GCA_001766815.1(0)	1	0	0	0	1	0
K00205	GB_GCA_001766825.1(1)	1	0	0.03	0	0.99	0.01
K00205	GB_GCA_003194425.1(2)	0	0	0.01	0	0	0
K00205	GB_GCA_003336485.1(3)	0	0	0	0	0	0
K00205	GB_GCA_003661125.1(4)	0	0	0.01	0	0	0
K00205	GB_GCA_011049045.1(5)	0	0	0	0	0	0
K00205	GB_GCA_013180605.1(6)	0	0	0.01	0	0	0
K00205	GB_GCA_013374505.1(7)	0	0	0.02	0.01	0	0
K00205	GB_GCA_014859735.1(8)	0	0	0	0	0	0
K00205	GB_GCA_016782355.1(9)	0	0	0.02	0	0	0
K00205	GB_GCA_017883965.1(10)	0	0	0	0	0	0
K00205	GB_GCA_021159465.1(11)	0	0	0.01	0	0	0
K00205	GB_GCA_023131215.1(12)	0	0	0.02	0	0	0
K00205	GB_GCA_023659785.1(13)	0	0	0.01	0	0	0
K00205	GB_GCA_024699715.1(14)	1	0	0	0	1	0
K00205	GB_GCA_026134025.1(15)	1	0	0	0	1	0
K00205	GB_GCA_026134085.1(16)	1	0	0	0	1	0
K00205	GB_GCA_029259535.1(17)	1	0	0.02	0	0.96	0.06
K00205	GB_GCA_029259545.1(18)	0	0	0.96	0	0	0
K00205	GB_GCA_030605385.1(19)	1	0	0.03	0	0.99	0.02
K00205	GB_GCA_030643285.1(20)	0	0	1.03	0	0	0.02
K00205	CG-1(21)	0	0	0.03	0.01	0	0.01
K00205	CG-2.new(22)	0	0	0.03	0	0	0
K00205	MW-1(23)	0	0	0.03	0	0	0.01
K00205	YL-2(24)	0	0	0.85	0	0	0
K00205	YL-1(25)	1	0	0	0	0.87	0.15
K00205	CM-1(26)	0	0	0.01	0	0	0
K00205	spire_mag_02087375(27)	1	0	0.01	0	1	0
K00205	spire_mag_02087448(28)	2	0	0	0	1.31	0.72
K00239	29	0	0	0	0	0	0
K00239	30	0	0	0	0	0	0
K00239	31	0	0	0	0	0	0
K00239	32	0	0	0.02	0	0	0
K00239	33	0	0	0	0	0	0
K00239	34	0	0	0	0	0	0
K00239	35	0	0	0	0	0	0
K00239	36	0	0	0	0	0	0
K00239	37	0	0	0	0	0	0
K00239	38	0	0	0	0	0	0
K00239	39	0.99	0	0	0.03	0.98	0.01
K00239	40	0.95	0	0	0.02	0.95	0
K00239	41	0	0	0	0	0	0
K00239	42	0	0	0	0	0	0
K00239	43	0.02	0	0	0.01	0.01	0.01
K00239	44	0	0	0	0	0	0
K00239	45	0	0	0	0	0	0
K00239	46	0.93	0	0	0.8	0.81	0.13
K00239	47	0	0	0	0	0	0
K00239	48	0	0	0	0	0	0
K00239	49	0	0	0	0	0	0
K00239	50	0	0	0	0	0	0
K00239	51	0	0	0	0	0	0
K00239	52	0	0	0	0	0	0
K00239	53	0	0	0	0	0	0
K00239	54	0	0	0	0	0	0
K00239	55	0	0	0	0	0	0
K00239	56	0	0	0	0	0	0
K00239	GB_GCA_001766815.1(0)	0	0	0	0	0	0
K00239	GB_GCA_001766825.1(1)	0	0	0	0	0	0
K00239	GB_GCA_003194425.1(2)	0	0	0	0	0	0
K00239	GB_GCA_003336485.1(3)	0	0	0	0	0	0
K00239	GB_GCA_003661125.1(4)	1	0	0	0.1	0.18	0.88
K00239	GB_GCA_011049045.1(5)	0	0	0	0	0	0
K00239	GB_GCA_013180605.1(6)	0	0	0	0	0	0
K00239	GB_GCA_013374505.1(7)	0	0	0	0	0	0
K00239	GB_GCA_014859735.1(8)	0	0	0	0	0	0
K00239	GB_GCA_016782355.1(9)	0	0	0	0	0	0
K00239	GB_GCA_017883965.1(10)	0	0	0	0	0	0
K00239	GB_GCA_021159465.1(11)	0	0	0	0	0	0
K00239	GB_GCA_023131215.1(12)	0	0	0	0	0	0
K00239	GB_GCA_023659785.1(13)	0	0	0	0	0	0
K00239	GB_GCA_024699715.1(14)	0	0	0.01	0.01	0	0
K00239	GB_GCA_026134025.1(15)	0	0	0	0	0	0
K00239	GB_GCA_026134085.1(16)	0	0	0	0	0	0
K00239	GB_GCA_029259535.1(17)	0	0	0	0	0	0
K00239	GB_GCA_029259545.1(18)	0	0	0	0	0	0
K00239	GB_GCA_030605385.1(19)	0	0	0	0	0	0
K00239	GB_GCA_030643285.1(20)	0	0	0	0	0	0
K00239	CG-1(21)	1	0	0	0	1	0.01
K00239	CG-2.new(22)	1	0	0.01	0.01	0.94	0.07
K00239	MW-1(23)	0	0	0.95	0	0	0
K00239	YL-2(24)	0	0	0.01	0.01	0	0
K00239	YL-1(25)	0	0	0	0	0	0
K00239	CM-1(26)	1	0	0.01	0.01	0.99	0.01
K00239	spire_mag_02087375(27)	0	0	0	0	0	0
K00239	spire_mag_02087448(28)	0	0	0	0	0	0
K00249	29	2.01	0	0.06	0	2.01	0.02
K00249	30	2.05	0.05	0.31	0	1.97	0.05
K00249	31	0.8	0.01	0.3	0	0.77	0.03
K00249	32	1.07	0.02	0.05	0	1.01	0.06
K00249	33	0.87	0	0.08	0	0.79	0.15
K00249	34	1.06	0	0.02	0	0.78	0.3
K00249	35	0.06	0	0.74	0	0.06	0.02
K00249	36	5.42	0.31	0.04	0.03	2.57	3.02
K00249	37	2.26	0.03	0.06	0.01	1.92	0.35
K00249	38	1.94	0.01	0.08	0	1.88	0.05
K00249	39	6.86	0.45	0.23	0	5.82	0.33
K00249	40	6.31	0.36	0.3	0	5.49	0.25
K00249	41	2.2	0.05	0.38	0.02	1.26	0.94
K00249	42	1.96	0.05	0.22	0	1.72	0.2
K00249	43	1.04	0.02	0.19	0	0.83	0.22
K00249	44	0.78	0.04	0.25	0.06	0.58	0.18
K00249	45	1.93	0.34	0.07	0.05	0.99	0.83
K00249	46	6	4.05	0.4	0.04	1.07	0.74
K00249	47	1.57	0.11	0.14	0.02	1.11	0.42
K00249	48	0.99	0.02	0.07	0	0.8	0.21
K00249	49	0.83	0	0.04	0.01	0.73	0.13
K00249	50	0.73	0	0.08	0	0.68	0.06
K00249	51	0.75	0.02	0.1	0.01	0.71	0.02
K00249	52	0.8	0.02	0.05	0.02	0.77	0.03
K00249	53	0.78	0	1.33	0	0.77	0.01
K00249	54	2.1	0.21	0.11	0.01	1.19	0.83
K00249	55	1.16	0.07	0.05	0.13	0.84	0.23
K00249	56	0.78	0.24	0	0.54	0.44	0
K00249	GB_GCA_001766815.1(0)	1	0	1.04	0	1	0.03
K00249	GB_GCA_001766825.1(1)	2	0	0.09	0	2	0.04
K00249	GB_GCA_003194425.1(2)	1	0.03	0.41	0	0.63	0.39
K00249	GB_GCA_003336485.1(3)	1	0.01	0.2	0	0.62	0.41
K00249	GB_GCA_003661125.1(4)	1	0	0.08	0	1	0.04
K00249	GB_GCA_011049045.1(5)	0	0	0.83	0	0	0.03
K00249	GB_GCA_013180605.1(6)	1	0	0.09	0	1	0.02
K00249	GB_GCA_013374505.1(7)	0	0	0.91	0	0	0.04
K00249	GB_GCA_014859735.1(8)	1	0.01	0.04	0	0.81	0.23
K00249	GB_GCA_016782355.1(9)	0	0	0.76	0	0	0.03
K00249	GB_GCA_017883965.1(10)	1	0	0.09	0	0.97	0.03
K00249	GB_GCA_021159465.1(11)	1	0.01	0.07	0	0.92	0.19
K00249	GB_GCA_023131215.1(12)	1	0.02	0.88	0	0.09	1.03
K00249	GB_GCA_023659785.1(13)	1	0.05	0.14	0.01	0.94	0.01
K00249	GB_GCA_024699715.1(14)	0	0	0.08	0	0	0.02
K00249	GB_GCA_026134025.1(15)	2	0	0.04	0	1.99	0.03
K00249	GB_GCA_026134085.1(16)	0	0	0.07	0	0	0.01
K00249	GB_GCA_029259535.1(17)	6	0.04	0.11	0	5.45	0.65
K00249	GB_GCA_029259545.1(18)	5	0.01	0.49	0	4.98	0.06
K00249	GB_GCA_030605385.1(19)	5	2.01	0.1	0	1.49	0.83
K00249	GB_GCA_030643285.1(20)	1	0	0.98	0	1	0.04
K00249	CG-1(21)	4	0.09	3.54	0	3.42	0.59
K00249	CG-2.new(22)	7	1.21	1.26	0	4.39	1.05
K00249	MW-1(23)	0	0.01	6.45	0	0	0.13
K00249	YL-2(24)	2	0.03	0.69	0	1.67	0.46
K00249	YL-1(25)	2	0.04	0.68	0.04	1.69	0.4
K00249	CM-1(26)	6	0.39	1.83	0	5.3	0.58
K00249	spire_mag_02087375(27)	2	0	0.07	0	1.94	0.13
K00249	spire_mag_02087448(28)	1	0	0.97	0	1	0.01
K00320	29	0.01	0	0.02	0	0.01	0
K00320	30	0.03	0	0.02	0	0.02	0.01
K00320	31	0	0	0	0	0	0
K00320	32	0.01	0	0.01	0	0	0.02
K00320	33	0.01	0	0.01	0.01	0	0.01
K00320	34	0	0	0.01	0	0	0.01
K00320	35	0.01	0	0.03	0	0.01	0
K00320	36	1.29	0.02	0.02	0.01	1.14	0.26
K00320	37	0.04	0	0.69	0	0.04	0
K00320	38	3	0.13	0.01	0.01	2.34	0.69
K00320	39	4.1	0.03	0.06	0	4.02	0.05
K00320	40	4.08	0	0.08	0	4.07	0.01
K00320	41	3.64	0.11	0.06	0.08	3.05	0.62
K00320	42	2.18	0.35	0	0.05	1	1.05
K00320	43	0	0	0.01	0	0	0
K00320	44	0	0	0	0	0	0
K00320	45	0.73	0.03	0.05	0.01	0.58	0.13
K00320	46	4.15	1.38	0.36	0.01	1.99	0.23
K00320	47	2.89	0.74	0.01	0.04	0.91	1.01
K00320	48	0.01	0	0	0	0.01	0
K00320	49	0.01	0	0.02	0	0.01	0.01
K00320	50	0.02	0	0.01	0	0	0.03
K00320	51	0	0	0.02	0	0	0.02
K00320	52	0	0	0.05	0	0	0.01
K00320	53	0.04	0	0.98	0	0.04	0
K00320	54	1.02	0	0.16	0	0.99	0.07
K00320	55	1.11	0.07	0	0.18	0.79	0.25
K00320	56	0.61	0.02	0	0.59	0.58	0
K00320	GB_GCA_001766815.1(0)	0	0	0.03	0	0	0.02
K00320	GB_GCA_001766825.1(1)	0	0	0.04	0	0	0.01
K00320	GB_GCA_003194425.1(2)	0	0	0.01	0	0	0
K00320	GB_GCA_003336485.1(3)	0	0	0.02	0	0	0.02
K00320	GB_GCA_003661125.1(4)	0	0	0	0	0	0
K00320	GB_GCA_011049045.1(5)	0	0	0	0	0	0
K00320	GB_GCA_013180605.1(6)	0	0	0.02	0	0	0.01
K00320	GB_GCA_013374505.1(7)	0	0	0.01	0	0	0
K00320	GB_GCA_014859735.1(8)	0	0	0	0	0	0
K00320	GB_GCA_016782355.1(9)	0	0	0.05	0	0	0.03
K00320	GB_GCA_017883965.1(10)	0	0	0	0	0	0
K00320	GB_GCA_021159465.1(11)	0	0	0.02	0	0	0.01
K00320	GB_GCA_023131215.1(12)	0	0	0.03	0	0	0.02
K00320	GB_GCA_023659785.1(13)	0	0	0.03	0	0	0.02
K00320	GB_GCA_024699715.1(14)	0	0	0.04	0	0	0.03
K00320	GB_GCA_026134025.1(15)	0	0	0.02	0	0	0.01
K00320	GB_GCA_026134085.1(16)	0	0	0.03	0	0	0.02
K00320	GB_GCA_029259535.1(17)	1	0	0.31	0	1	0.02
K00320	GB_GCA_029259545.1(18)	2	0	0.02	0	1.4	0.73
K00320	GB_GCA_030605385.1(19)	0	0	0.05	0	0	0.01
K00320	GB_GCA_030643285.1(20)	1	0	2.04	0	0.98	0.04
K00320	CG-1(21)	4	0	0.1	0	4	0
K00320	CG-2.new(22)	4	0.01	0.19	0	3.98	0.03
K00320	MW-1(23)	0	0	4.08	0	0	0
K00320	YL-2(24)	3	0.04	0.73	0	2.94	0.05
K00320	YL-1(25)	4	0	0.05	0	3.69	0.41
K00320	CM-1(26)	4	0	0.1	0	4	0
K00320	spire_mag_02087375(27)	4	0.26	0.05	0.01	3.28	0.78
K00320	spire_mag_02087448(28)	2	0.01	0.46	0	1.76	0.27
K00330	29	1	0	0	0	1	0
K00330	30	1	0	0	0.49	0.66	0.34
K00330	31	0	0	0	0	0	0
K00330	32	0	0	0	0	0	0
K00330	33	0	0	0	0	0	0
K00330	34	0	0	0	0	0	0
K00330	35	0	0	0	0	0	0
K00330	36	0	0	0.01	0.01	0	0
K00330	37	0.17	0	0	0.09	0.09	0.08
K00330	38	0	0	0	0	0	0
K00330	39	1.05	0.05	0	0	0.95	0
K00330	40	1	0	0	0	1	0
K00330	41	0.98	0	0	0.01	0.98	0.01
K00330	42	0	0	0	0	0	0
K00330	43	0	0	0	0	0	0
K00330	44	0	0	0	0	0	0
K00330	45	0	0	0	0	0	0
K00330	46	1	0	0	0.01	0.97	0.03
K00330	47	0.96	0	0	0.39	0.39	0.57
K00330	48	0	0	0	0	0	0
K00330	49	0	0	0	0	0	0
K00330	50	0	0	0	0	0	0
K00330	51	0	0	0	0	0	0
K00330	52	0	0	0	0	0	0
K00330	53	0	0	0	0	0	0
K00330	54	0	0	0	0	0	0
K00330	55	0	0	0	0	0	0
K00330	56	0	0	0	0	0	0
K00330	GB_GCA_001766815.1(0)	1	0	0	0	1	0
K00330	GB_GCA_001766825.1(1)	1	0	0	0	1	0
K00330	GB_GCA_003194425.1(2)	0	0	0	0	0	0
K00330	GB_GCA_003336485.1(3)	0	0	0	0	0	0
K00330	GB_GCA_003661125.1(4)	0	0	0	0	0	0
K00330	GB_GCA_011049045.1(5)	0	0	0	0	0	0
K00330	GB_GCA_013180605.1(6)	0	0	0	0	0	0
K00330	GB_GCA_013374505.1(7)	0	0	0	0	0	0
K00330	GB_GCA_014859735.1(8)	0	0	0	0	0	0
K00330	GB_GCA_016782355.1(9)	0	0	0	0	0	0
K00330	GB_GCA_017883965.1(10)	0	0	0	0	0	0
K00330	GB_GCA_021159465.1(11)	0	0	0	0	0	0
K00330	GB_GCA_023131215.1(12)	0	0	0	0	0	0
K00330	GB_GCA_023659785.1(13)	0	0	0	0	0	0
K00330	GB_GCA_024699715.1(14)	0	0	0	0	0	0
K00330	GB_GCA_026134025.1(15)	1	0	0	0	1	0
K00330	GB_GCA_026134085.1(16)	0	0	0	0	0	0
K00330	GB_GCA_029259535.1(17)	0	0	0	0	0	0
K00330	GB_GCA_029259545.1(18)	0	0	0	0	0	0
K00330	GB_GCA_030605385.1(19)	0	0	0.17	0	0	0
K00330	GB_GCA_030643285.1(20)	0	0	0	0	0	0
K00330	CG-1(21)	1	0.01	0.06	0	0.99	0
K00330	CG-2.new(22)	1	0	0	0	1	0
K00330	MW-1(23)	1	0	0	0	1	0
K00330	YL-2(24)	0	0	0.98	0	0	0
K00330	YL-1(25)	1	0	0	0	0.99	0.02
K00330	CM-1(26)	2	0.94	0	0	0.15	0.01
K00330	spire_mag_02087375(27)	0	0	0	0	0	0
K00330	spire_mag_02087448(28)	0	0	0	0	0	0
K00331	29	0.99	0	0	0	0.99	0
K00331	30	0.99	0	0	0.45	0.62	0.37
K00331	31	0	0	0	0	0	0
K00331	32	0	0	0	0	0	0
K00331	33	0	0	0	0	0	0
K00331	34	0	0	0	0	0	0
K00331	35	0	0	0	0	0	0
K00331	36	0	0	0	0	0	0
K00331	37	0.17	0	0	0.12	0.12	0.05
K00331	38	0	0	0	0	0	0
K00331	39	1	0	0	0	1	0
K00331	40	1	0	0	0	1	0
K00331	41	1	0	0	0	1	0
K00331	42	0	0	0	0	0	0
K00331	43	0	0	0	0	0	0
K00331	44	0	0	0	0	0	0
K00331	45	0	0	0	0	0	0
K00331	46	1	0	0	0	1	0
K00331	47	1	0	0	0.42	0.43	0.58
K00331	48	0	0	0	0	0	0
K00331	49	0	0	0	0	0	0
K00331	50	0	0	0	0	0	0
K00331	51	0	0	0	0	0	0
K00331	52	0	0	0	0	0	0
K00331	53	0	0	0	0	0	0
K00331	54	0	0	0	0	0	0
K00331	55	0	0	0	0	0	0
K00331	56	0	0	0	0	0	0
K00331	GB_GCA_001766815.1(0)	1	0	0	0	0.99	0.01
K00331	GB_GCA_001766825.1(1)	1	0	0.01	0	0.98	0.02
K00331	GB_GCA_003194425.1(2)	0	0	0	0	0	0
K00331	GB_GCA_003336485.1(3)	0	0	0	0	0	0
K00331	GB_GCA_003661125.1(4)	0	0	0	0	0	0
K00331	GB_GCA_011049045.1(5)	0	0	0	0	0	0
K00331	GB_GCA_013180605.1(6)	0	0	0	0	0	0
K00331	GB_GCA_013374505.1(7)	0	0	0	0	0	0
K00331	GB_GCA_014859735.1(8)	0	0	0	0	0	0
K00331	GB_GCA_016782355.1(9)	0	0	0	0	0	0
K00331	GB_GCA_017883965.1(10)	0	0	0	0	0	0
K00331	GB_GCA_021159465.1(11)	0	0	0	0	0	0
K00331	GB_GCA_023131215.1(12)	0	0	0	0	0	0
K00331	GB_GCA_023659785.1(13)	0	0	0	0	0	0
K00331	GB_GCA_024699715.1(14)	0	0	0.01	0	0	0.01
K00331	GB_GCA_026134025.1(15)	1	0	0	0.01	1	0
K00331	GB_GCA_026134085.1(16)	0	0	0	0	0	0
K00331	GB_GCA_029259535.1(17)	0	0	0	0	0	0
K00331	GB_GCA_029259545.1(18)	0	0	0	0	0	0
K00331	GB_GCA_030605385.1(19)	0	0	0.17	0	0	0
K00331	GB_GCA_030643285.1(20)	0	0	0	0	0	0
K00331	CG-1(21)	1	0	0	0	1	0
K00331	CG-2.new(22)	1	0	0	0	1	0
K00331	MW-1(23)	1	0	0	0	1	0
K00331	YL-2(24)	1	0	0	0	1	0
K00331	YL-1(25)	1	0	0	0	1	0
K00331	CM-1(26)	1	0	0	0	1	0
K00331	spire_mag_02087375(27)	0	0	0	0	0	0
K00331	spire_mag_02087448(28)	0	0	0	0	0	0
K00332	29	1	0	0	0	1	0
K00332	30	1	0	0	0	1	0
K00332	31	0	0	0	0	0	0
K00332	32	0	0	0	0	0	0
K00332	33	0	0	0	0	0	0
K00332	34	0	0	0	0	0	0
K00332	35	0	0	0	0	0	0
K00332	36	1	0	0	0	1	0
K00332	37	1	0	0	0	1	0
K00332	38	0	0	0	0	0	0
K00332	39	1	0	0	0	1	0
K00332	40	1	0	0	0	1	0
K00332	41	1	0	0	0	1	0
K00332	42	0	0	1	0	0	0
K00332	43	0	0	0	0	0	0
K00332	44	0	0	0	0	0	0
K00332	45	1	0	0	0	1	0
K00332	46	1	0	0	0	1	0
K00332	47	1	0	0	0	1	0
K00332	48	0	0	0	0	0	0
K00332	49	0	0	0	0	0	0
K00332	50	0	0	0	0	0	0
K00332	51	0	0	0	0	0	0
K00332	52	0	0	0	0	0	0
K00332	53	0	0	1	0	0	0
K00332	54	1	0	0	0	1	0
K00332	55	1	0	0	0	1	0
K00332	56	1	0	0	1	1	0
K00332	GB_GCA_001766815.1(0)	1	0	0	0	1	0
K00332	GB_GCA_001766825.1(1)	1	0	0	0	1	0
K00332	GB_GCA_003194425.1(2)	0	0	0	0	0	0
K00332	GB_GCA_003336485.1(3)	0	0	0	0	0	0
K00332	GB_GCA_003661125.1(4)	0	0	0	0	0	0
K00332	GB_GCA_011049045.1(5)	0	0	0	0	0	0
K00332	GB_GCA_013180605.1(6)	0	0	0	0	0	0
K00332	GB_GCA_013374505.1(7)	0	0	0	0	0	0
K00332	GB_GCA_014859735.1(8)	0	0	0	0	0	0
K00332	GB_GCA_016782355.1(9)	0	0	0	0	0	0
K00332	GB_GCA_017883965.1(10)	0	0	0	0	0	0
K00332	GB_GCA_021159465.1(11)	0	0	0	0	0	0
K00332	GB_GCA_023131215.1(12)	0	0	0	0	0	0
K00332	GB_GCA_023659785.1(13)	0	0	0	0	0	0
K00332	GB_GCA_024699715.1(14)	0	0	0	0	0	0
K00332	GB_GCA_026134025.1(15)	1	0	0	0	1	0
K00332	GB_GCA_026134085.1(16)	0	0	0	0	0	0
K00332	GB_GCA_029259535.1(17)	1	0	0	0	1	0
K00332	GB_GCA_029259545.1(18)	0	0	1	0	0	0
K00332	GB_GCA_030605385.1(19)	0	0	1	0	0	0
K00332	GB_GCA_030643285.1(20)	0	0	0	0	0	0
K00332	CG-1(21)	1	0	0	0	1	0
K00332	CG-2.new(22)	1	0	0	0	1	0
K00332	MW-1(23)	0	0	1	0	0	0
K00332	YL-2(24)	1	0	0	0	1	0
K00332	YL-1(25)	1	0	0	0	1	0
K00332	CM-1(26)	0	0	1	0	0	0
K00332	spire_mag_02087375(27)	0	0	0	0	0	0
K00332	spire_mag_02087448(28)	0	0	0	0	0	0
K00333	29	1	0	0	0	1	0
K00333	30	1	0	0	0.48	0.67	0.34
K00333	31	0	0	0	0	0	0
K00333	32	0	0	0	0	0	0
K00333	33	0	0	0	0	0	0
K00333	34	0	0	0	0	0	0
K00333	35	0	0	0	0	0	0
K00333	36	0	0	0	0	0	0
K00333	37	0.18	0	0	0.1	0.1	0.08
K00333	38	0	0	0	0	0	0
K00333	39	1	0	0	0	1	0
K00333	40	1	0	0	0	1	0
K00333	41	1	0	0	0	1	0
K00333	42	0	0	0	0	0	0
K00333	43	0	0	0	0	0	0
K00333	44	0	0	0	0	0	0
K00333	45	0	0	0	0	0	0
K00333	46	1	0	0	0	1	0
K00333	47	1	0	0	0.4	0.42	0.6
K00333	48	0	0	0	0	0	0
K00333	49	0	0	0	0	0	0
K00333	50	0	0	0	0	0	0
K00333	51	0	0	0	0	0	0
K00333	52	0	0	0	0	0	0
K00333	53	0	0	0	0	0	0
K00333	54	0	0	0	0	0	0
K00333	55	0	0	0	0	0	0
K00333	56	0	0	0	0	0	0
K00333	GB_GCA_001766815.1(0)	1	0	0	0	1	0
K00333	GB_GCA_001766825.1(1)	1	0	0	0	1	0
K00333	GB_GCA_003194425.1(2)	0	0	0	0	0	0
K00333	GB_GCA_003336485.1(3)	0	0	0	0	0	0
K00333	GB_GCA_003661125.1(4)	0	0	0	0	0	0
K00333	GB_GCA_011049045.1(5)	0	0	0	0	0	0
K00333	GB_GCA_013180605.1(6)	0	0	0	0	0	0
K00333	GB_GCA_013374505.1(7)	0	0	0	0	0	0
K00333	GB_GCA_014859735.1(8)	0	0	0	0	0	0
K00333	GB_GCA_016782355.1(9)	0	0	0	0	0	0
K00333	GB_GCA_017883965.1(10)	0	0	0	0	0	0
K00333	GB_GCA_021159465.1(11)	0	0	0	0	0	0
K00333	GB_GCA_023131215.1(12)	0	0	0.01	0.01	0	0
K00333	GB_GCA_023659785.1(13)	0	0	0	0	0	0
K00333	GB_GCA_024699715.1(14)	0	0	0	0	0	0
K00333	GB_GCA_026134025.1(15)	1	0	0	0	1	0
K00333	GB_GCA_026134085.1(16)	0	0	0.01	0.01	0	0
K00333	GB_GCA_029259535.1(17)	0	0	0	0	0	0
K00333	GB_GCA_029259545.1(18)	0	0	0	0	0	0
K00333	GB_GCA_030605385.1(19)	0	0	0.18	0	0	0
K00333	GB_GCA_030643285.1(20)	0	0	0	0	0	0
K00333	CG-1(21)	1	0	0	0	1	0
K00333	CG-2.new(22)	1	0	0	0	1	0
K00333	MW-1(23)	0	0	1	0	0	0
K00333	YL-2(24)	1	0	0.01	0	1	0.01
K00333	YL-1(25)	1	0	0	0	1	0
K00333	CM-1(26)	1	0	0	0	1	0
K00333	spire_mag_02087375(27)	0	0	0	0	0	0
K00333	spire_mag_02087448(28)	0	0	0	0	0	0
K00334	29	0	0	0	0	0	0
K00334	30	0	0	0	0	0	0
K00334	31	0.84	0	0.01	0.01	0.84	0
K00334	32	1.01	0	0.01	0	1	0.02
K00334	33	0.15	0	0	0	0.04	0.13
K00334	34	0.84	0	0.05	0.15	0.45	0.41
K00334	35	0	0	0	0	0	0
K00334	36	0	0	0	0	0	0
K00334	37	0	0	0.03	0	0	0
K00334	38	0.97	0	0	0.01	0.93	0.04
K00334	39	0	0	0.01	0	0	0
K00334	40	0.01	0	0	0	0	0.01
K00334	41	0	0	0	0	0	0
K00334	42	0.92	0	0	0.25	0.31	0.64
K00334	43	1	0	0.01	0	1	0
K00334	44	0.33	0	0	0.05	0.24	0.1
K00334	45	0.03	0	0	0.01	0.01	0.02
K00334	46	0	0	0	0	0	0
K00334	47	0	0	0	0	0	0
K00334	48	1.01	0	0.03	0.02	0.94	0.08
K00334	49	0.94	0	0	0.18	0.62	0.33
K00334	50	0.43	0	0.01	0.11	0.3	0.15
K00334	51	0.18	0	0	0.11	0.14	0.05
K00334	52	0.02	0	0	0	0	0.02
K00334	53	0	0	0	0	0	0
K00334	54	0	0	0	0	0	0
K00334	55	0	0	0	0	0	0
K00334	56	0	0	0	0	0	0
K00334	GB_GCA_001766815.1(0)	0	0	0	0	0	0
K00334	GB_GCA_001766825.1(1)	0	0	0.01	0	0	0.01
K00334	GB_GCA_003194425.1(2)	1	0	0.01	0	1	0
K00334	GB_GCA_003336485.1(3)	1	0	0.25	0	0.15	0.92
K00334	GB_GCA_003661125.1(4)	1	0	0	0	1	0
K00334	GB_GCA_011049045.1(5)	1	0	0.01	0.01	0.88	0.16
K00334	GB_GCA_013180605.1(6)	1	0	0.03	0	0.98	0.02
K00334	GB_GCA_013374505.1(7)	1	0	0.15	0	0.17	1
K00334	GB_GCA_014859735.1(8)	0	0	0.84	0	0	0
K00334	GB_GCA_016782355.1(9)	0	0	0.43	0	0	0
K00334	GB_GCA_017883965.1(10)	1	0	0	0	0.91	0.16
K00334	GB_GCA_021159465.1(11)	1	0	0.02	0.02	0.25	0.85
K00334	GB_GCA_023131215.1(12)	1	0	0.1	0	0.86	0.16
K00334	GB_GCA_023659785.1(13)	1	0	0.06	0.03	0.99	0.02
K00334	GB_GCA_024699715.1(14)	0	0	0.03	0	0	0.03
K00334	GB_GCA_026134025.1(15)	0	0	0	0	0	0
K00334	GB_GCA_026134085.1(16)	0	0	0	0	0	0
K00334	GB_GCA_029259535.1(17)	0	0	0.01	0.01	0	0
K00334	GB_GCA_029259545.1(18)	0	0	0.02	0	0	0.02
K00334	GB_GCA_030605385.1(19)	0	0	0.01	0	0	0.01
K00334	GB_GCA_030643285.1(20)	0	0	0.98	0	0	0.01
K00334	CG-1(21)	0	0	0	0	0	0
K00334	CG-2.new(22)	0	0	0	0	0	0
K00334	MW-1(23)	0	0	0.04	0	0	0.03
K00334	YL-2(24)	0	0	0.02	0	0	0.02
K00334	YL-1(25)	0	0	0	0	0	0
K00334	CM-1(26)	0	0	0.01	0.01	0	0
K00334	spire_mag_02087375(27)	1	0	0.02	0.02	0.99	0.03
K00334	spire_mag_02087448(28)	1	0	0.02	0	0.94	0.1
K00335	29	0.01	0	0	0	0.01	0
K00335	30	0.01	0	0.01	0.02	0.01	0
K00335	31	0.89	0	0.05	0.01	0.84	0.05
K00335	32	1	0	0	0.01	0.92	0.1
K00335	33	0.69	0	0.04	0.02	0.46	0.27
K00335	34	0.88	0	0.17	0.06	0.75	0.2
K00335	35	0	0	0.11	0	0	0.01
K00335	36	0	0	0.01	0	0	0
K00335	37	0	0	0.18	0	0	0
K00335	38	1	0	0.03	0	0.97	0.05
K00335	39	0	0	0.02	0	0	0.01
K00335	40	0.01	0	0.02	0.01	0.01	0.01
K00335	41	0	0	0.02	0	0	0.01
K00335	42	0.98	0	0	0.08	0.29	0.72
K00335	43	0.89	0	0.05	0.01	0.89	0.01
K00335	44	0.79	0	0.01	0.02	0.67	0.16
K00335	45	0.18	0	0.01	0.04	0.04	0.15
K00335	46	0.01	0	0.01	0	0	0.01
K00335	47	0.01	0	0	0	0	0.01
K00335	48	0.92	0	0.22	0.07	0.73	0.22
K00335	49	0.85	0	0.02	0.05	0.68	0.2
K00335	50	0.62	0	0.14	0.04	0.53	0.1
K00335	51	0.62	0	0.03	0.16	0.59	0.05
K00335	52	0.44	0	0	0.22	0.35	0.12
K00335	53	0.1	0	0	0.08	0.09	0.01
K00335	54	0.01	0	0	0.01	0.01	0
K00335	55	0	0	0	0	0	0
K00335	56	0	0	0	0	0	0
K00335	GB_GCA_001766815.1(0)	0	0	0.01	0	0	0
K00335	GB_GCA_001766825.1(1)	0	0	0.02	0.01	0	0
K00335	GB_GCA_003194425.1(2)	1	0	0.03	0	0.94	0.11
K00335	GB_GCA_003336485.1(3)	1	0	0.29	0.01	0.68	0.49
K00335	GB_GCA_003661125.1(4)	0	0	0.89	0	0	0
K00335	GB_GCA_011049045.1(5)	1	0	0	0.01	0.93	0.1
K00335	GB_GCA_013180605.1(6)	1	0	0.02	0	0.99	0.02
K00335	GB_GCA_013374505.1(7)	1	0	0.28	0.02	0.49	0.57
K00335	GB_GCA_014859735.1(8)	0	0	0.89	0	0	0
K00335	GB_GCA_016782355.1(9)	0	0	0.64	0	0	0.02
K00335	GB_GCA_017883965.1(10)	1	0	0.05	0	0.89	0.17
K00335	GB_GCA_021159465.1(11)	1	0	0.21	0.01	0.54	0.51
K00335	GB_GCA_023131215.1(12)	1	0	0.55	0.01	0.42	0.69
K00335	GB_GCA_023659785.1(13)	1	0	0	0	1	0
K00335	GB_GCA_024699715.1(14)	0	0	0.02	0.01	0	0.01
K00335	GB_GCA_026134025.1(15)	0	0	0.02	0	0	0.01
K00335	GB_GCA_026134085.1(16)	0	0	0.01	0	0	0.01
K00335	GB_GCA_029259535.1(17)	0	0	0	0	0	0
K00335	GB_GCA_029259545.1(18)	0	0	0.01	0	0	0.01
K00335	GB_GCA_030605385.1(19)	0	0	0	0	0	0
K00335	GB_GCA_030643285.1(20)	1	0	0.03	0	0.99	0.03
K00335	CG-1(21)	0	0	0.01	0	0	0.01
K00335	CG-2.new(22)	0	0	0.03	0	0	0.02
K00335	MW-1(23)	0	0	0.02	0	0	0.01
K00335	YL-2(24)	0	0	0	0	0	0
K00335	YL-1(25)	0	0	0.01	0.01	0	0
K00335	CM-1(26)	0	0	0.01	0	0	0.01
K00335	spire_mag_02087375(27)	1	0	0.02	0	0.99	0.02
K00335	spire_mag_02087448(28)	1	0	0	0	0.98	0.02
K00336	29	0.24	0	0.04	0.02	0.14	0.13
K00336	30	0.13	0	0.05	0.01	0.08	0.06
K00336	31	0.03	0	0.01	0	0.02	0.01
K00336	32	0.33	0	0.01	0	0.12	0.27
K00336	33	0	0	0.02	0	0	0
K00336	34	0.03	0	0.02	0	0.01	0.03
K00336	35	1	0	0.02	0	0.95	0.1
K00336	36	1.02	0	0.01	0	0.95	0.07
K00336	37	0.11	0	0.53	0	0.1	0.01
K00336	38	1.04	0	0.16	0.01	1.02	0.03
K00336	39	0.05	0	0.06	0	0.05	0
K00336	40	0.11	0	0.06	0	0.11	0.01
K00336	41	1	0	0.01	0	0.84	0.21
K00336	42	1.16	0	0	0.1	0.78	0.43
K00336	43	0.07	0	0.04	0.01	0.02	0.08
K00336	44	0.02	0	0.02	0.02	0.01	0.01
K00336	45	0.63	0	0.07	0.06	0.53	0.13
K00336	46	0.16	0	0.65	0	0.15	0.01
K00336	47	0.8	0	0.09	0	0.71	0.13
K00336	48	0.02	0	0.02	0.02	0.02	0
K00336	49	0.02	0	0.03	0	0.02	0.02
K00336	50	0.03	0	0	0	0.01	0.02
K00336	51	0.01	0	0.01	0	0.01	0
K00336	52	0.02	0	0.9	0	0.02	0
K00336	53	0.92	0	0.06	0	0.91	0.02
K00336	54	0.96	0	0.04	0.03	0.78	0.21
K00336	55	0.76	0	0.02	0.08	0.6	0.19
K00336	56	0.51	0	0	0.51	0.51	0
K00336	GB_GCA_001766815.1(0)	0	0	0.25	0.01	0	0
K00336	GB_GCA_001766825.1(1)	0	0	0.13	0	0	0
K00336	GB_GCA_003194425.1(2)	0	0	0.03	0	0	0.01
K00336	GB_GCA_003336485.1(3)	0	0	0.02	0	0	0
K00336	GB_GCA_003661125.1(4)	0	0	0.07	0	0	0
K00336	GB_GCA_011049045.1(5)	0	0	0.05	0	0	0.02
K00336	GB_GCA_013180605.1(6)	0	0	0.34	0	0	0.01
K00336	GB_GCA_013374505.1(7)	0	0	0.02	0	0	0.02
K00336	GB_GCA_014859735.1(8)	0	0	0.03	0	0	0
K00336	GB_GCA_016782355.1(9)	0	0	0.03	0	0	0
K00336	GB_GCA_017883965.1(10)	0	0	0.03	0	0	0
K00336	GB_GCA_021159465.1(11)	0	0	0.01	0	0	0.01
K00336	GB_GCA_023131215.1(12)	0	0	0.05	0.01	0	0.02
K00336	GB_GCA_023659785.1(13)	1	0	0.01	0.01	0.41	0.67
K00336	GB_GCA_024699715.1(14)	1	0	0.01	0	0.99	0.01
K00336	GB_GCA_026134025.1(15)	1	0	0	0.05	0.39	0.71
K00336	GB_GCA_026134085.1(16)	1	0	0.01	0	0.99	0.01
K00336	GB_GCA_029259535.1(17)	1	0	0.03	0	0.99	0.01
K00336	GB_GCA_029259545.1(18)	1	0	0.03	0	1	0.01
K00336	GB_GCA_030605385.1(19)	0	0	0.11	0	0	0
K00336	GB_GCA_030643285.1(20)	1	0	0.07	0	0.98	0.03
K00336	CG-1(21)	0	0	0.05	0	0	0
K00336	CG-2.new(22)	0	0	0.18	0	0	0.02
K00336	MW-1(23)	0	0	0.12	0	0	0.01
K00336	YL-2(24)	1	0	0	0	1	0
K00336	YL-1(25)	1	0	0	0	1	0
K00336	CM-1(26)	0	0	0.05	0	0	0
K00336	spire_mag_02087375(27)	1	0	0.08	0	0.96	0.04
K00336	spire_mag_02087448(28)	2	0	0.01	0.05	1.34	0.8
K00337	29	1	0	0	0	1	0
K00337	30	1	0	0	0.49	0.67	0.33
K00337	31	0	0	0	0	0	0
K00337	32	0	0	0	0	0	0
K00337	33	0	0	0	0	0	0
K00337	34	0	0	0	0	0	0
K00337	35	0	0	0	0	0	0
K00337	36	0	0	0	0	0	0
K00337	37	0.18	0	0	0.1	0.1	0.08
K00337	38	0	0	0	0	0	0
K00337	39	1	0	0	0	1	0
K00337	40	1	0	0	0	0.99	0.01
K00337	41	1	0	0	0	0.99	0.01
K00337	42	0	0	0	0	0	0
K00337	43	0	0	0	0	0	0
K00337	44	0	0	0	0	0	0
K00337	45	0	0	0	0	0	0
K00337	46	0.99	0	0	0	0.99	0
K00337	47	0.99	0	0	0.4	0.4	0.59
K00337	48	0	0	0	0	0	0
K00337	49	0	0	0	0	0	0
K00337	50	0	0	0	0	0	0
K00337	51	0	0	0	0	0	0
K00337	52	0	0	0	0	0	0
K00337	53	0	0	0	0	0	0
K00337	54	0	0	0	0	0	0
K00337	55	0	0	0	0	0	0
K00337	56	0	0	0	0	0	0
K00337	GB_GCA_001766815.1(0)	1	0	0	0	1	0
K00337	GB_GCA_001766825.1(1)	1	0	0	0	1	0
K00337	GB_GCA_003194425.1(2)	0	0	0	0	0	0
K00337	GB_GCA_003336485.1(3)	0	0	0	0	0	0
K00337	GB_GCA_003661125.1(4)	0	0	0	0	0	0
K00337	GB_GCA_011049045.1(5)	0	0	0	0	0	0
K00337	GB_GCA_013180605.1(6)	0	0	0	0	0	0
K00337	GB_GCA_013374505.1(7)	0	0	0	0	0	0
K00337	GB_GCA_014859735.1(8)	0	0	0	0	0	0
K00337	GB_GCA_016782355.1(9)	0	0	0	0	0	0
K00337	GB_GCA_017883965.1(10)	0	0	0	0	0	0
K00337	GB_GCA_021159465.1(11)	0	0	0	0	0	0
K00337	GB_GCA_023131215.1(12)	0	0	0.01	0	0	0.01
K00337	GB_GCA_023659785.1(13)	0	0	0	0	0	0
K00337	GB_GCA_024699715.1(14)	0	0	0	0	0	0
K00337	GB_GCA_026134025.1(15)	1	0	0	0	1	0
K00337	GB_GCA_026134085.1(16)	0	0	0	0	0	0
K00337	GB_GCA_029259535.1(17)	0	0	0	0	0	0
K00337	GB_GCA_029259545.1(18)	0	0	0	0	0	0
K00337	GB_GCA_030605385.1(19)	0	0	0.18	0	0	0
K00337	GB_GCA_030643285.1(20)	0	0	0.01	0.01	0	0
K00337	CG-1(21)	1	0	0	0	1	0
K00337	CG-2.new(22)	1	0	0	0	1	0.01
K00337	MW-1(23)	1	0	0	0	1	0
K00337	YL-2(24)	1	0	0	0	1	0
K00337	YL-1(25)	1	0	0	0	1	0
K00337	CM-1(26)	1	0	0	0	1	0
K00337	spire_mag_02087375(27)	0	0	0	0	0	0
K00337	spire_mag_02087448(28)	0	0	0	0	0	0
K00338	29	1	0	0	0	0.99	0.01
K00338	30	0.99	0	0	0.35	0.51	0.49
K00338	31	0	0	0	0	0	0
K00338	32	0	0	0	0	0	0
K00338	33	0	0	0	0	0	0
K00338	34	0	0	0	0	0	0
K00338	35	0	0	0	0	0	0
K00338	36	0	0	0	0	0	0
K00338	37	0.15	0	0	0.09	0.09	0.06
K00338	38	0	0	0	0	0	0
K00338	39	1	0	0	0	1	0
K00338	40	1	0	0	0	1	0
K00338	41	0.94	0	0	0	0.94	0.01
K00338	42	0	0	0	0	0	0
K00338	43	0	0	0	0	0	0
K00338	44	0	0	0	0	0	0
K00338	45	0	0	0	0	0	0
K00338	46	1	0	0	0.04	0.97	0.03
K00338	47	0.93	0	0	0.51	0.52	0.42
K00338	48	0	0	0	0	0	0
K00338	49	0	0	0	0	0	0
K00338	50	0	0	0	0	0	0
K00338	51	0	0	0	0	0	0
K00338	52	0	0	0	0	0	0
K00338	53	0	0	0	0	0	0
K00338	54	0	0	0	0	0	0
K00338	55	0	0	0	0	0	0
K00338	56	0	0	0	0	0	0
K00338	GB_GCA_001766815.1(0)	1	0	0	0	1	0
K00338	GB_GCA_001766825.1(1)	1	0	0	0	1	0.01
K00338	GB_GCA_003194425.1(2)	0	0	0	0	0	0
K00338	GB_GCA_003336485.1(3)	0	0	0	0	0	0
K00338	GB_GCA_003661125.1(4)	0	0	0	0	0	0
K00338	GB_GCA_011049045.1(5)	0	0	0	0	0	0
K00338	GB_GCA_013180605.1(6)	0	0	0	0	0	0
K00338	GB_GCA_013374505.1(7)	0	0	0	0	0	0
K00338	GB_GCA_014859735.1(8)	0	0	0	0	0	0
K00338	GB_GCA_016782355.1(9)	0	0	0	0	0	0
K00338	GB_GCA_017883965.1(10)	0	0	0	0	0	0
K00338	GB_GCA_021159465.1(11)	0	0	0	0	0	0
K00338	GB_GCA_023131215.1(12)	0	0	0	0	0	0
K00338	GB_GCA_023659785.1(13)	0	0	0	0	0	0
K00338	GB_GCA_024699715.1(14)	0	0	0	0	0	0
K00338	GB_GCA_026134025.1(15)	1	0	0	0	1	0
K00338	GB_GCA_026134085.1(16)	0	0	0	0	0	0
K00338	GB_GCA_029259535.1(17)	0	0	0	0	0	0
K00338	GB_GCA_029259545.1(18)	0	0	0	0	0	0
K00338	GB_GCA_030605385.1(19)	0	0	0.15	0	0	0
K00338	GB_GCA_030643285.1(20)	0	0	0	0	0	0
K00338	CG-1(21)	1	0	0	0	1	0
K00338	CG-2.new(22)	1	0	0	0	1	0
K00338	MW-1(23)	0	0	1	0	0	0
K00338	YL-2(24)	0	0	0.95	0.01	0	0
K00338	YL-1(25)	1	0	0	0	0.95	0.06
K00338	CM-1(26)	1	0	0	0	1	0
K00338	spire_mag_02087375(27)	0	0	0	0	0	0
K00338	spire_mag_02087448(28)	0	0	0	0	0	0
K00339	29	1	0	0	0	1	0
K00339	30	1	0	0	0.3	0.45	0.55
K00339	31	0	0	0	0	0	0
K00339	32	0	0	0.01	0	0	0
K00339	33	0	0	0	0	0	0
K00339	34	0	0	0	0	0	0
K00339	35	0	0	0	0	0	0
K00339	36	0	0	0	0	0	0
K00339	37	0.15	0	0	0.06	0.06	0.09
K00339	38	0	0	0	0	0	0
K00339	39	1	0	0	0	1	0
K00339	40	1	0	0	0.01	1	0
K00339	41	0	0	0.01	0	0	0
K00339	42	0	0	0	0	0	0
K00339	43	0.01	0	0	0	0.01	0
K00339	44	0	0	0	0	0	0
K00339	45	0	0	0	0	0	0
K00339	46	0.99	0	0	0.6	0.61	0.38
K00339	47	0.01	0	0	0.01	0.01	0
K00339	48	0.01	0	0	0.01	0.01	0
K00339	49	0	0	0	0	0	0
K00339	50	0	0	0	0	0	0
K00339	51	0	0	0	0	0	0
K00339	52	0	0	0	0	0	0
K00339	53	0	0	0	0	0	0
K00339	54	0	0	0	0	0	0
K00339	55	0	0	0	0	0	0
K00339	56	0	0	0	0	0	0
K00339	GB_GCA_001766815.1(0)	1	0	0	0	1	0
K00339	GB_GCA_001766825.1(1)	1	0	0	0	1	0
K00339	GB_GCA_003194425.1(2)	0	0	0.01	0	0	0
K00339	GB_GCA_003336485.1(3)	0	0	0	0	0	0
K00339	GB_GCA_003661125.1(4)	0	0	0.01	0	0	0
K00339	GB_GCA_011049045.1(5)	0	0	0	0	0	0
K00339	GB_GCA_013180605.1(6)	0	0	0	0	0	0
K00339	GB_GCA_013374505.1(7)	0	0	0	0	0	0
K00339	GB_GCA_014859735.1(8)	0	0	0	0	0	0
K00339	GB_GCA_016782355.1(9)	0	0	0	0	0	0
K00339	GB_GCA_017883965.1(10)	0	0	0	0	0	0
K00339	GB_GCA_021159465.1(11)	0	0	0	0	0	0
K00339	GB_GCA_023131215.1(12)	0	0	0	0	0	0
K00339	GB_GCA_023659785.1(13)	0	0	0	0	0	0
K00339	GB_GCA_024699715.1(14)	0	0	0	0	0	0
K00339	GB_GCA_026134025.1(15)	1	0	0	0	1	0
K00339	GB_GCA_026134085.1(16)	0	0	0	0	0	0
K00339	GB_GCA_029259535.1(17)	0	0	0	0	0	0
K00339	GB_GCA_029259545.1(18)	0	0	0	0	0	0
K00339	GB_GCA_030605385.1(19)	0	0	0.15	0	0	0
K00339	GB_GCA_030643285.1(20)	0	0	0	0	0	0
K00339	CG-1(21)	1	0	0	0	1	0
K00339	CG-2.new(22)	1	0	0.01	0	0.98	0.02
K00339	MW-1(23)	0	0	1	0	0	0
K00339	YL-2(24)	0	0	0	0	0	0
K00339	YL-1(25)	0	0	0	0	0	0
K00339	CM-1(26)	1	0	0.01	0.01	1	0
K00339	spire_mag_02087375(27)	0	0	0	0	0	0
K00339	spire_mag_02087448(28)	0	0	0	0	0	0
K00340	29	1	0	0	0	1	0
K00340	30	1	0	0	0.32	0.52	0.49
K00340	31	0	0	0	0	0	0
K00340	32	0	0	0	0	0	0
K00340	33	0	0	0	0	0	0
K00340	34	0	0	0	0	0	0
K00340	35	0	0	0	0	0	0
K00340	36	0	0	0	0	0	0
K00340	37	0.19	0	0	0.12	0.12	0.07
K00340	38	0	0	0	0	0	0
K00340	39	1	0	0	0	1	0
K00340	40	1	0	0	0	1	0
K00340	41	1	0	0	0	1	0
K00340	42	0	0	0	0	0	0
K00340	43	0	0	0	0	0	0
K00340	44	0	0	0	0	0	0
K00340	45	0	0	0	0	0	0
K00340	46	1	0	0	0	1	0
K00340	47	1	0	0	0.56	0.56	0.44
K00340	48	0	0	0	0	0	0
K00340	49	0	0	0	0	0	0
K00340	50	0	0	0	0	0	0
K00340	51	0	0	0	0	0	0
K00340	52	0	0	0	0	0	0
K00340	53	0	0	0	0	0	0
K00340	54	0	0	0	0	0	0
K00340	55	0	0	0	0	0	0
K00340	56	0	0	0	0	0	0
K00340	GB_GCA_001766815.1(0)	1	0	0	0	1	0
K00340	GB_GCA_001766825.1(1)	1	0	0	0	1	0
K00340	GB_GCA_003194425.1(2)	0	0	0	0	0	0
K00340	GB_GCA_003336485.1(3)	0	0	0	0	0	0
K00340	GB_GCA_003661125.1(4)	0	0	0	0	0	0
K00340	GB_GCA_011049045.1(5)	0	0	0	0	0	0
K00340	GB_GCA_013180605.1(6)	0	0	0	0	0	0
K00340	GB_GCA_013374505.1(7)	0	0	0	0	0	0
K00340	GB_GCA_014859735.1(8)	0	0	0	0	0	0
K00340	GB_GCA_016782355.1(9)	0	0	0	0	0	0
K00340	GB_GCA_017883965.1(10)	0	0	0	0	0	0
K00340	GB_GCA_021159465.1(11)	0	0	0	0	0	0
K00340	GB_GCA_023131215.1(12)	0	0	0	0	0	0
K00340	GB_GCA_023659785.1(13)	0	0	0	0	0	0
K00340	GB_GCA_024699715.1(14)	0	0	0	0	0	0
K00340	GB_GCA_026134025.1(15)	1	0	0	0	1	0
K00340	GB_GCA_026134085.1(16)	0	0	0	0	0	0
K00340	GB_GCA_029259535.1(17)	0	0	0	0	0	0
K00340	GB_GCA_029259545.1(18)	0	0	0	0	0	0
K00340	GB_GCA_030605385.1(19)	0	0	0.19	0	0	0
K00340	GB_GCA_030643285.1(20)	0	0	0	0	0	0
K00340	CG-1(21)	1	0	0	0	1	0
K00340	CG-2.new(22)	1	0	0	0	1	0
K00340	MW-1(23)	0	0	1	0	0	0
K00340	YL-2(24)	1	0	0	0	1	0
K00340	YL-1(25)	1	0	0	0	1	0
K00340	CM-1(26)	1	0	0	0	1	0
K00340	spire_mag_02087375(27)	0	0	0	0	0	0
K00340	spire_mag_02087448(28)	0	0	0	0	0	0
K00341	29	1	0	0	0	0.99	0.02
K00341	30	0.98	0	0	0.1	0.69	0.71
K00341	31	1.04	0	0	0.04	0.99	0.06
K00341	32	0	0	0	0	0	0
K00341	33	0	0	0.01	0	0	0.01
K00341	34	0.94	0	0	0.56	0.78	0.27
K00341	35	0.01	0	0	0.01	0.01	0
K00341	36	0	0	0	0	0	0
K00341	37	0.17	0	0	0.01	0.06	0.16
K00341	38	0	0	0	0	0	0
K00341	39	1	0	0	0	1	0
K00341	40	1	0	0	0	1	0
K00341	41	1.32	0	0.01	0	1.05	0.36
K00341	42	0	0	0	0	0	0
K00341	43	0	0	0	0	0	0
K00341	44	0.11	0	0	0.09	0.09	0.02
K00341	45	0	0	0	0	0	0
K00341	46	1	0	0	0	0.98	0.03
K00341	47	0.97	0	0	0.09	0.29	0.88
K00341	48	0	0	0	0	0	0
K00341	49	0	0	0	0	0	0
K00341	50	0	0	0	0	0	0
K00341	51	0	0	0	0	0	0
K00341	52	0	0	0	0	0	0
K00341	53	0	0	0	0	0	0
K00341	54	0	0	0	0	0	0
K00341	55	0	0	0	0	0	0
K00341	56	0	0	0	0	0	0
K00341	GB_GCA_001766815.1(0)	1	0	0.01	0	1	0.01
K00341	GB_GCA_001766825.1(1)	1	0	0.03	0.01	0.98	0.04
K00341	GB_GCA_003194425.1(2)	0	0	0	0	0	0
K00341	GB_GCA_003336485.1(3)	0	0	0.12	0	0	0.01
K00341	GB_GCA_003661125.1(4)	0	0	0	0	0	0
K00341	GB_GCA_011049045.1(5)	1	0	0.05	0	0.99	0.01
K00341	GB_GCA_013180605.1(6)	0	0	0	0	0	0
K00341	GB_GCA_013374505.1(7)	0	0	0	0	0	0
K00341	GB_GCA_014859735.1(8)	2	0	0	0.07	1.18	0.89
K00341	GB_GCA_016782355.1(9)	0	0	0.03	0	0	0.03
K00341	GB_GCA_017883965.1(10)	1	0	0.01	0	0.96	0.07
K00341	GB_GCA_021159465.1(11)	0	0	0	0	0	0
K00341	GB_GCA_023131215.1(12)	1	0	0.01	0	0	1.01
K00341	GB_GCA_023659785.1(13)	0	0	0	0	0	0
K00341	GB_GCA_024699715.1(14)	0	0	0.03	0	0	0.02
K00341	GB_GCA_026134025.1(15)	1	0	0	0	1	0
K00341	GB_GCA_026134085.1(16)	0	0	0.02	0	0	0.01
K00341	GB_GCA_029259535.1(17)	0	0	0	0	0	0
K00341	GB_GCA_029259545.1(18)	0	0	0.02	0	0	0.02
K00341	GB_GCA_030605385.1(19)	0	0	0.18	0	0	0.01
K00341	GB_GCA_030643285.1(20)	0	0	0.01	0	0	0.01
K00341	CG-1(21)	1	0	0	0	1	0
K00341	CG-2.new(22)	1	0	0.02	0	1	0.02
K00341	MW-1(23)	0	0	1.01	0	0	0.01
K00341	YL-2(24)	1	0	0.33	0	0.99	0.01
K00341	YL-1(25)	2	0	0.01	0.02	1.6	0.67
K00341	CM-1(26)	1	0	0.01	0	1	0.01
K00341	spire_mag_02087375(27)	0	0	0	0	0	0
K00341	spire_mag_02087448(28)	0	0	0.01	0	0	0.01
K00342	29	0	0	0	0	0	0
K00342	30	0	0	0	0	0	0
K00342	31	1.62	0	0	0	1.45	0.19
K00342	32	0.19	0	0	0.06	0.1	0.1
K00342	33	0	0	0	0	0	0
K00342	34	1.43	0	0	0.02	1.01	0.44
K00342	35	0.01	0	0	0	0	0.01
K00342	36	0	0	0	0	0	0
K00342	37	0	0	0	0	0	0
K00342	38	0	0	0	0	0	0
K00342	39	1.01	0	0	0	1	0.01
K00342	40	1	0	0.01	0	0.99	0.01
K00342	41	1.69	0	0	0	0.89	0.82
K00342	42	0	0	0	0	0	0
K00342	43	0.03	0	0	0.01	0.02	0.01
K00342	44	0.97	0	0	0.65	0.69	0.31
K00342	45	0	0	0	0	0	0
K00342	46	1	0	0	0	0.9	0.13
K00342	47	0.87	0	0	0.02	0.12	0.85
K00342	48	0.01	0	0	0	0.01	0
K00342	49	0.01	0	0	0	0.01	0
K00342	50	0.01	0	0	0	0.01	0
K00342	51	0.01	0	0	0.01	0.01	0
K00342	52	0	0	0	0	0	0
K00342	53	0	0	0	0	0	0
K00342	54	0	0	0	0	0	0
K00342	55	0	0	0	0	0	0
K00342	56	0	0	0	0	0	0
K00342	GB_GCA_001766815.1(0)	0	0	0	0	0	0
K00342	GB_GCA_001766825.1(1)	0	0	0	0	0	0
K00342	GB_GCA_003194425.1(2)	0	0	0.03	0.01	0	0.01
K00342	GB_GCA_003336485.1(3)	1	0	0.04	0.01	0.96	0.06
K00342	GB_GCA_003661125.1(4)	0	0	0.03	0	0	0
K00342	GB_GCA_011049045.1(5)	2	0	0.02	0	1.91	0.4
K00342	GB_GCA_013180605.1(6)	1	0	0.05	0.18	0.35	0.68
K00342	GB_GCA_013374505.1(7)	0	0	0.01	0	0	0.01
K00342	GB_GCA_014859735.1(8)	2	0	0.01	0	1.8	0.39
K00342	GB_GCA_016782355.1(9)	0	0	0.07	0	0	0.06
K00342	GB_GCA_017883965.1(10)	2	0	0.02	0	1.71	0.59
K00342	GB_GCA_021159465.1(11)	0	0	0.01	0	0	0.01
K00342	GB_GCA_023131215.1(12)	1	0	0.04	0	0.05	1.03
K00342	GB_GCA_023659785.1(13)	0	0	0.19	0	0	0
K00342	GB_GCA_024699715.1(14)	0	0	0.03	0	0	0.02
K00342	GB_GCA_026134025.1(15)	0	0	0.05	0	0	0.05
K00342	GB_GCA_026134085.1(16)	0	0	0.04	0	0	0.03
K00342	GB_GCA_029259535.1(17)	0	0	0	0	0	0
K00342	GB_GCA_029259545.1(18)	0	0	0.05	0.01	0	0.04
K00342	GB_GCA_030605385.1(19)	0	0	0	0	0	0
K00342	GB_GCA_030643285.1(20)	0	0	0.05	0.01	0	0.04
K00342	CG-1(21)	1	0	0.04	0	0.99	0.03
K00342	CG-2.new(22)	2	0	0.01	0	1.08	1.01
K00342	MW-1(23)	1	0	0.08	0.01	0.99	0.07
K00342	YL-2(24)	1	0	0.77	0	1	0.08
K00342	YL-1(25)	2	0	0.01	0	1.79	0.32
K00342	CM-1(26)	1	0	0.05	0	0.98	0.04
K00342	spire_mag_02087375(27)	0	0	0.04	0	0	0.04
K00342	spire_mag_02087448(28)	0	0	0.02	0	0	0.02
K00343	29	1	0	0	0.01	0.99	0.01
K00343	30	0.98	0	0	0.4	0.56	0.45
K00343	31	0	0	0	0	0	0
K00343	32	0	0	0	0	0	0
[truncated: 3,758 more rows]

## Sheet: Suppl. Table 6
SRA_ID	Sample_type	relative abundance of Ca. 'Aerarchaeaceae'	relative abundance of Ca. 'Methanodefluvaceae'	Latitude	Longitude
ERR1353536	soil	0.00248855	0	36.5922	-119.506
ERR1353569	soil	0.00144236	0	36.5922	-119.506
ERR1353600	soil	0.00335289	0	36.5922	-119.506
ERR1353606	soil	0.0105604	0	36.5922	-119.506
ERR1353612	soil	0.00218782	0	36.5922	-119.506
ERR1353621	soil	0.00150996	0	36.5922	-119.506
ERR1353624	soil	0.00988175	0	36.5922	-119.506
ERR1353627	soil	0.00305899	0	36.5922	-119.506
ERR1414295	groundwater	0.00720721	0	51.1138	10.4306
ERR1414301	groundwater	0.0171409	0	51.1149	10.4479
ERR1414303	groundwater	0.0820008	0	51.1149	10.4479
ERR1414304	groundwater	0.0107009	0	51.1149	10.4479
ERR1414356	groundwater	0.121507	0	51.1149	10.4479
ERR1447411	groundwater	0	0.000541688	27.4253	85.1827
ERR1447413	groundwater	0	0.000428944	27.4253	85.1827
ERR1447428	groundwater	0.00201145	0	27.4203	85.1807
ERR1447429	groundwater	0.00250354	0	27.4203	85.1807
ERR1447431	groundwater	0.00263756	0	27.4203	85.1807
ERR1447448	groundwater	0.00304475	0	27.4203	85.1807
ERR1447453	groundwater	0.0013828	0	27.4203	85.1807
ERR1447462	groundwater	0	0.00205291	27.4253	85.1827
ERR1447463	groundwater	0.000686639	0	27.4216	85.1815
ERR1447464	groundwater	0.00281457	0	27.4203	85.1807
ERR1551961	groundwater	0.00349504	0	51.2093	10.7922
ERR1589484	soil	0	0.0504541	33.05	102.35
ERR1683639	groundwater	0.00546986	0	51.1193	10.4692
ERR2119494	soil	0	0.00549209	33	102
ERR2119496	soil	0	0.0396915	33	102
ERR2322392	groundwater	0.00122272	0	51.1065	10.3979
ERR2322401	groundwater	0.00344535	0	51.1938	10.7185
ERR2322402	groundwater	0.00415593	0	51.1938	10.7185
ERR2322403	groundwater	0.00077394	0	51.1938	10.7185
ERR2322409	groundwater	0.00158253	0	51.1975	10.7555
ERR2322414	groundwater	0.00237541	0	51.1975	10.7555
ERR2322416	groundwater	0.00154231	0	51.1975	10.7555
ERR2322418	groundwater	0.00295919	0	51.1975	10.7555
ERR2322420	groundwater	0.00711136	0	51.1975	10.7555
ERR2322421	groundwater	0.003335	0	51.1973	10.7549
ERR2322445	groundwater	0.00196562	0	51.2093	10.7922
ERR2322451	groundwater	0.00533096	0	51.2093	10.7922
ERR2322452	groundwater	0.000894951	0	51.2093	10.7922
ERR2322456	groundwater	0.00149725	0	51.2093	10.7922
ERR2560105	groundwater	0.00131486	0	51.1149	10.4306
ERR2560106	groundwater	0.00306488	0	51.1149	10.4306
ERR2734706	freshwater	0.0172216	0	48.125	16.753
ERR2734861	freshwater	0.00741297	0	48.125	16.753
ERR2734862	freshwater	0.0213746	0	48.125	16.753
ERR2734866	freshwater	0.0110992	0	48.125	16.753
ERR2734867	freshwater	0.0230608	0	48.125	16.753
ERR2734868	freshwater	0.00622752	0	48.125	16.753
ERR2734869	freshwater	0.00499251	0	48.125	16.753
ERR2734875	freshwater	0.00311785	0	48.125	16.753
ERR2734876	freshwater	0.0132666	0	48.125	16.753
ERR2734877	freshwater	0.0228595	0	48.125	16.753
ERR2734878	freshwater	0.00977199	0	48.125	16.753
ERR2734879	freshwater	0.00223599	0	48.125	16.753
ERR2734880	freshwater	0.0247481	0	48.125	16.753
ERR2734881	freshwater	0.0280581	0	48.125	16.753
ERR2734882	freshwater	0.00585268	0	48.125	16.753
ERR2734883	freshwater	0.00667401	0	48.125	16.753
ERR2734884	freshwater	0.00874374	0	48.125	16.753
ERR2734885	freshwater	0.00725426	0	48.125	16.753
ERR2734886	freshwater	0.00148359	0	48.125	16.753
ERR2734887	freshwater	0.00247161	0	48.125	16.753
ERR2734888	freshwater	0.00354497	0	48.125	16.753
ERR2734893	freshwater	0.00110656	0	48.125	16.753
ERR2734894	freshwater	0.000861802	0	48.125	16.753
ERR2734901	freshwater	0.00233894	0	48.125	16.753
ERR2734902	freshwater	0.00204048	0	48.125	16.753
ERR2734907	freshwater	0.00810189	0	48.125	16.753
ERR2734908	freshwater	0.00239682	0	48.125	16.753
ERR2734909	freshwater	0.0104684	0	48.125	16.753
ERR2734910	freshwater	0.0053663	0	48.125	16.753
ERR2734912	freshwater	0.00565232	0	48.125	16.753
ERR2734913	freshwater	0.00456885	0	48.125	16.753
ERR571292	groundwater	0	0.0195137	61.2369	21.4408
ERR788947	freshwater_sediment	0	0.000469845	28.7695	116.376
ERR904481	groundwater	0.00140264	0	21.7202	39.8686
ERR985481	freshwater_sediment	0	0.0192678	31.395	120.036
ERR985482	freshwater_sediment	0	0.0140154	31.395	120.036
ERR985486	freshwater_sediment	0	0.00870777	31.326	119.951
SRR1283962	groundwater	0	0.00610501	57.4344	16.66
SRR1924348	groundwater	0	0.0629327	40.11	-88.21
SRR2059608	hot_springs	0.00337234	0	41.1263	-120.034
SRR2059609	hot_springs	0.014982	0	41.3129	-120.043
SRR2083886	freshwater	0	0.000367017	49	-123
SRR2083894	freshwater	0	0.000352399	49	-123
SRR2083910	freshwater	0	0.000309693	49	-123
SRR2083918	freshwater	0	0.000983894	49	-123
SRR2083922	freshwater	0	0.000307907	49	-123
SRR2083946	freshwater	0	0.00104036	49	-123
SRR2083974	freshwater	0.0016879	0	49	-123
SRR2083982	freshwater	0.00108488	0	49	-123
SRR2083988	freshwater	0.00112467	0	49	-123
SRR2084015	freshwater	0.00047571	0	49	-123
SRR2084028	freshwater	0	7.7479e-05	49	-123
SRR2084045	freshwater	0.000886977	0	49	-123
SRR2142328	groundwater	0	0.00108235	22.44	-88.28
SRR2297155	mine_drainage	0	0.00869338	60	17.1
SRR2989167	freshwater_sediment	0	0.00397219	25.91	100.15
SRR2989569	freshwater_sediment	0	0.0037522	25.75	100.19
SRR3032053	mine_drainage	0.0383362	0	-32.8048	-66.085
SRR3085569	soil	0.00469969	0	30	110
SRR3085580	soil	0.00255239	0	30	110
SRR3085584	soil	0.00254797	0	30	110
SRR3456295	soil	0.00275415	0	-30.041	115.02
SRR3598021	freshwater	0	0.00148697	33.9743	-83.425
SRR3598027	freshwater	0	0.00252848	33.9481	-83.3799
SRR3598029	freshwater	0.00122944	0	33.9241	-83.3208
SRR3598042	freshwater	0.000260762	0	33.9107	-83.4009
SRR3598048	freshwater	0	0.00251467	33.9267	-83.4612
SRR3598054	freshwater	0	0.00114805	33.9255	-83.5226
SRR3598068	freshwater	0.00172516	0	33.9661	-83.4312
SRR3598070	freshwater	0.000921353	0	33.9638	-83.444
SRR3598076	freshwater	0.000673923	0	33.9418	-83.4016
SRR3598110	freshwater	0	0.00144995	33.9481	-83.3799
SRR3598112	freshwater	0.000429199	0	33.8772	-83.3998
SRR3598119	freshwater	0.0006985	0	33.9683	-83.4971
SRR3598120	freshwater	0.00150204	0	33.9567	-83.4177
SRR3598160	freshwater	0	0.00099987	34.0634	-83.3452
SRR3598169	freshwater	0.00187333	0	33.9669	-83.3906
SRR3598176	freshwater	0	0.00778353	33.9664	-83.3979
SRR3598180	freshwater	0	0.00120637	33.9455	-83.3542
SRR3598185	freshwater	0.000435947	0	33.9481	-83.3799
SRR3598189	freshwater	0.00218202	0	33.903	-83.3797
SRR3598201	freshwater	0	0.000867875	33.9077	-83.3599
SRR3598203	freshwater	0.000974023	0.000974023	33.9263	-83.4268
SRR3598207	freshwater	0	0.000227058	33.9683	-83.4971
SRR3944733	freshwater	0	0.00147369	31.77	120.96
SRR3944804	freshwater	0	0.00174711	29.42	113.13
SRR3944827	freshwater	0	0.00986986	28.67	112.87
SRR3944828	freshwater	0	0.00150392	28.67	112.87
SRR3944945	freshwater	0	0.000922135	29.67	113.32
SRR3944985	freshwater	0	0.00100588	31.77	118.47
SRR5161790	mine_drainage	0.0107006	0	-6.44322	-50.0358
SRR5161791	mine_drainage	0.00263083	0	-6.44322	-50.0358
SRR5161796	mine_drainage	0.0451194	0	-6.44322	-50.0358
SRR5161799	mine_drainage	0.0105806	0	-6.44322	-50.0358
SRR5161806	mine_drainage	0.000548703	0	-6.44322	-50.0358
SRR5176907	aquatic	0.0028108	0	10.9432	-85.6349
SRR5176908	aquatic	0.00255167	0.00127584	10.9432	-85.6349
SRR5176909	aquatic	0.00244093	0	10.9432	-85.6349
SRR5176910	aquatic	0.0533808	0	10.9213	-85.7047
SRR5176911	aquatic	0.0208066	0	10.9213	-85.7047
SRR5176912	aquatic	0.0370302	0	10.9213	-85.7047
SRR5176913	aquatic	0.0153057	0	10.9223	-85.6523
SRR5176914	aquatic	0.0216757	0.00394104	10.9223	-85.6523
SRR5176915	aquatic	0.0226076	0	10.9223	-85.6523
SRR5176916	aquatic	0.00406545	0	10.8569	-85.6585
SRR5176917	aquatic	0.00610538	0	10.8569	-85.6585
SRR5176918	aquatic	0.00149321	0	10.8569	-85.6585
SRR5176921	aquatic	0.00561398	0	10.8593	-85.7096
SRR5176923	aquatic	0.00761151	0	10.8897	-85.7231
SRR5176936	aquatic	0	0.00139439	10.8897	-85.7231
SRR5235680	soil	0.00471555	0	47.34	-95.05
SRR6424889	groundwater	0	0.000319493	30.44	112.72
SRR6513158	freshwater	0.00138163	0	42.56	-76.25
SRR6513193	freshwater	0.00309903	0	42.56	-76.25
SRR6666220	mine_drainage	0	0.00174407	31.17	120.41
SRR6782645	freshwater	0	0.00444701	45.4447	-69.1763
SRR6828950	aquatic	0	0.000981508	30.52	113.24
SRR6828953	aquatic	0.000975077	0	30.51	113.23
SRR6828955	aquatic	0	0.00964916	30.36	113.25
SRR6828959	aquatic	0	0.00117182	30.49	113.15
SRR6828997	aquatic	0	0.00185561	30.45	113.34
SRR6829003	aquatic	0.0117683	0.0262524	30.44	113.36
SRR6829014	aquatic	0	0.00103287	30.46	113.09
SRR6829049	aquatic	0	0.00125178	30.38	113.02
SRR6829051	aquatic	0	0.00772201	30.54	113.04
SRR6829053	aquatic	0	0.00269913	30.39	113.07
SRR6829056	aquatic	0	0.010484	30.47	113.44
SRR6829062	aquatic	0	0.00706547	30.4	113.36
SRR6829063	aquatic	0.00601884	0.00100314	30.41	113.28
SRR6829067	aquatic	0	0.0121037	30.5	113.12
SRR6829074	aquatic	0	0.0335494	30.36	113.29
SRR6829075	aquatic	0	0.00513941	30.48	113.28
SRR6829078	aquatic	0	0.00458758	30.5	113.35
SRR6829082	aquatic	0.00179264	0.0143412	30.42	113.26
SRR6913769	marine	0	0.025047	30.04	112.55
SRR6933860	groundwater	0.00056615	0	17.2978	-74.1283
SRR7183062	groundwater	0	0.015613	63.2524	-120.846
SRR7537707	groundwater	0	0.000107522	22.44	88.28
SRR7549654	freshwater	0.000337313	0	37.84	127.91
SRR7585068	aquatic	0.0025382	0	42.25	-93.25
SRR7585083	aquatic	0.0041437	0	42.25	-93.25
SRR7585138	aquatic	0.00274522	0	42.25	-93.25
SRR7585155	aquatic	0.00537519	0	42.25	-93.25
SRR7585164	aquatic	0.00319898	0	42.25	-93.25
SRR7612654	freshwater	0	0.00156399	33.9181	-83.4139
SRR8284902	marine	0.00132099	0	22.46	113.92
SRR8284903	marine	0	0.00134698	22.49	113.95
SRR8284906	freshwater	0.0015825	0	22.56	113.95
SRR8284907	marine	0.00284556	0.00142278	22.47	113.93
SRR8284910	marine	0.000961428	0	22.47	113.94
SRR8284922	freshwater	0.0122119	0	22.55	113.95
SRR8284927	marine	0	0.0018525	22.5	114.01
SRR8284928	freshwater	0.00706614	0.0052996	22.53	113.95
SRR8284933	freshwater	0.00688144	0.00114691	22.54	113.95
SRR8284936	freshwater	0.0066394	0	22.58	113.95
SRR8284938	marine	0.000682231	0	22.46	113.92
SRR8284992	freshwater	0.00113542	0.00340627	22.59	113.98
SRR8285011	marine	0	0.000951285	22.5	113.97
SRR8285014	freshwater	0.000786931	0.00157386	22.55	113.95
SRR8285033	marine	0.00148511	0	22.5	114.01
SRR8307474	cave	0.00312823	0	19.0245	-99.0876
SRR8427255	groundwater	0.000129127	9.22336e-06	35.9755	-84.2747
SRR8499419	groundwater	0	0.00127707	30.14	113.68
SRR8499431	groundwater	0	0.0163733	30.7	113.49
SRR8499432	groundwater	0	0.00678702	30.7	113.49
SRR8499433	groundwater	0	0.00313082	30.18	113.61
SRR8499436	groundwater	0	0.00137853	30.18	113.61
SRR8499441	groundwater	0	0.00290858	30.18	113.61
SRR8499444	groundwater	0	0.00366925	30.18	113.61
SRR8499447	groundwater	0	0.00484943	30.7	113.49
SRR8499448	groundwater	0	0.022007	30.7	113.49
SRR8499449	groundwater	0	0.0014621	30.18	113.61
SRR8499468	groundwater	0	0.00767433	30.14	113.68
SRR8499472	groundwater	0	0.00154913	30.14	113.68
SRR8499473	groundwater	0	0.00136983	30.14	113.68
SRR8499474	groundwater	0	0.000910954	30.14	113.68
SRR8499477	groundwater	0	0.00166157	30.18	113.61
SRR8499478	groundwater	0	0.00175079	30.18	113.61
SRR8499481	groundwater	0	0.0492097	30.7	113.49
SRR8499482	groundwater	0	0.0160282	30.7	113.49
SRR8499485	groundwater	0	0.00127675	30.14	113.68
SRR8499487	groundwater	0	0.0127628	30.14	113.68
SRR8499488	groundwater	0	0.00196909	30.14	113.68
SRR8499491	groundwater	0	0.00276725	30.14	113.68
SRR8499494	groundwater	0	0.00117927	30.14	113.68
SRR8499495	groundwater	0	0.00828404	30.14	113.68
SRR8499496	groundwater	0	0.00213748	30.14	113.68
SRR8499504	groundwater	0	0.00103098	30.14	113.68
SRR8499518	groundwater	0	0.00131517	30.18	113.61
SRR8499522	groundwater	0	0.107859	30.7	113.49
SRR8499523	groundwater	0	0.103546	30.7	113.49
SRR8499528	groundwater	0	0.00877001	30.14	113.68
SRR8499532	groundwater	0	0.0041993	30.14	113.68
SRR8499535	groundwater	0	0.00105496	30.14	113.68
SRR8569951	freshwater	0.00142835	0	51.15	22.34
SRR8591568	groundwater	0.00841976	0	24.9749	87.3737
SRR8591569	groundwater	0.00430553	0	24.0401	87.278
SRR8591570	groundwater	0.00082976	0	24.0419	87.2776
SRR8591571	groundwater	0.00285506	0	24.0404	87.2771
SRR8693954	plant	0.0076599	0	23.733	92.6673
SRR8693955	plant	0.00535494	0	23.733	92.6673
SRR8693956	plant	0.000974668	0	23.733	92.6673
SRR947069	freshwater	1.817	0	23	113.47

## Sheet: Suppl. Table 7
SRA_ID	Sample_type	relative abundance of Ca. 'Aerarchaeaceae'	relative abundance of Ca. 'Methanodefluvaceae'	Latitude	Longitude
cave	SRR7811943	0.0194519	0	19.0643	-155.801
marine sediment	SRR10168432	0.00258754	0	34.95	54.56
freshwater	SRR12687952	0.011311	0	36.4428	-116.828
hot springs	SRR5747861	0.0702736	0	36.96	-116.72
freshwater	SRR12687342	0.0255397	0	37.0233	-117.385
groundwater	SRR12113424	0.0160569	0	37.6619	-121.115
groundwater	SRR12113431	0.109188	0	37.6619	-121.115
groundwater	SRR12113422	0.0325089	0	37.6619	-121.115
groundwater	SRR12113420	0.0159316	0	37.6619	-121.115
groundwater	SRR12113432	0.0738451	0	37.6619	-121.115
groundwater	SRR12113428	0.052447	0	37.6619	-121.115
groundwater	SRR12113421	0.0115728	0	37.6619	-121.115
groundwater	SRR12113418	0.0448898	0	37.6619	-121.115
groundwater	SRR12113425	0.215038	0	37.6619	-121.115
groundwater	SRR12113429	0.0554828	0	37.6619	-121.115
groundwater	SRR12113426	0.0555134	0	37.6619	-121.115
groundwater	SRR12113401	0.0300674	0	37.6619	-121.115
groundwater	SRR12113386	0.1119	0	37.6619	-121.115
groundwater	SRR12113433	0.0943541	0	37.6619	-121.115
groundwater	SRR12113419	0.0799261	0	37.6619	-121.115
cave	SRR8536157	0.0101199	0	38.1667	-79.633
groundwater	SRR12113409	0.0377169	0	38.6684	-122.588
groundwater	SRR12113410	0.0373232	0	38.6684	-122.588
soil	SRR3972149	0.00625106	0	39.53	-107.78
soil	SRR3989306	0.00351528	0	39.53	-107.78
soil	SRR3990171	0.00320549	0	39.53	-107.78
soil	SRR3989430	0.00454329	0	39.53	-107.78
soil	SRR3990168	0.00399358	0	39.53	-107.78
soil	SRR3990174	0.00280829	0	39.5348	-107.783
soil	SRR3989338	0.00132724	0	39.5348	-107.783
soil	SRR3990169	0.00268521	0	39.5348	-107.783
soil	SRR3990172	0.00314	0	39.5348	-107.783
groundwater	SRR2090157	0.00217648	0	39.5369	-107.783
groundwater	SRR6261452	0.053773	0	46.2	10.52
groundwater	SRR6943130	0.0621183	0	46.2	10.52
wastewater	SRR5468574	0.0276502	0	52.2278	5.919
mine drainage	SRR5161805	0.25831	0	-6.44322	-50.0358
mine drainage	SRR5161795	0.472255	0	-6.44322	-50.0358
mine drainage	SRR5161788	0.134518	0	-6.44322	-50.0358
mine drainage	SRR5161794	0.116669	0	-6.44322	-50.0358
freshwater sediment	ERR6226080	0.137242	0	39.4789	2.886
freshwater sediment	SRR8539650	0	0.0354544	2.4915	121.377
freshwater sediment	SRR5215466	0	0.0964986	2.75	121.05
freshwater sediment	SRR5215464	0	0.0115641	2.75	121.05
marine sediment	SRR6208352	0	0.0106846	34.6402	-77.1094
marine sediment	SRR5248172	0	0.00562273	34.6402	-77.1094
groundwater	SRR12113407	0	0.00412718	38.7027	-122.519
freshwater sediment	SRR6436091	0	0.00437166	41.3778	-82.5108
groundwater	SRR6514730	0	0.00538033	57.4344	16.66
marine	SRR14699968	0	0.00485249	9.9	138.51
aquatic	SRR1564103	0	0.0846908	22.1167	90.2833
aquatic	SRR1573565	0	0.037485	22.1167	90.2833
aquatic	SRR1573578	0	0.0534534	22.1167	90.2833
freshwater sediment	ERR4334734	0	0.00992516	39.7537	-105.048
freshwater sediment	ERR4334736	0	0.0128675	39.7537	-105.048
freshwater sediment	ERR4334731	0	0.0112975	39.7537	-105.048
freshwater sediment	ERR4334730	0	0.0101526	39.7537	-105.048
freshwater sediment	ERR2191546	0	0.109512	57.434	16.66
freshwater sediment	ERR3804376	0	0.0298023	39.7537	-105.048
freshwater sediment	ERR3804373	0	0.015032	39.7537	-105.048
freshwater sediment	ERR3804374	0	0.0160228	39.7537	-105.048
freshwater sediment	ERR3804375	0	0.0284618	39.7537	-105.048
freshwater sediment	SRR9617649	0	0.0331947	44.5099	-110.358
freshwater sediment	SRR11719878	0	0.0575922	44.5106	-110.357
